# Supplementary material for: Sequence variants associated with BMI affect disease risk through BMI itself
Source: Springer Nature journal article supplement (doi:10.1038/s41467-024-53568-9), 2024-11-12
Supplement: MOESM1 [file 41467_2024_53568_MOESM1_ESM.pdf]

# Supplementary Information for the Article

## „Genetically predicted BMI affects disease risk through BMI itself“

### Supplementary Notes

#### Introduction

This supplementary document contains supplementary figures, tables, and brief notes on specific details in the analysis that did not fit in the main manuscript. This includes information regarding nonlinear effects and derivation of theoretical effects stemming from adjustments for a measured exposure in the GRS outcome association analysis from a gaussian directed acyclic graph. We furthermore include mediation analysis of the outliers exclusively and we describe in more detail the smoking adjustment.

#### Nonlinear relationship between BMI and diseases

Since we observed differences in the effect estimates of the genetic scores and the BMI phenotype, specifically for heart failure and myocardial infarction in UK Biobank, we investigated the BMI phenotype associations further. The relationship between BMI and HF risk suggests that for BMI in the range 20-23 kg/m<sup>2</sup>, the risk is near constant (Supplementary Figure 22). This pattern is not consistent with the log-linear link between BMI and disease risk which is the functional relationship assumed by our models. We decided to reassess the associations after excluding low and high BMI. We tried excluding individuals with BMI below 25 kg/m<sup>2</sup> at first visit and those with BMI over 35 kg/m<sup>2</sup> at first visit (Supplementary Figure 23 and Supplementary Table 9). The HF association is clearly sensitive to the exclusion of individuals with BMI lower than 25 kg/m<sup>2</sup>, as the OR for the entire dataset is 1.11 but 1.15 when individuals with BMI under 25 kg/m<sup>2</sup> are excluded.

## Mediation due to partial observation of exposure and spurious associations of BMI-GRS with outcomes through confounders

In order to understand what can influence the GRS effect, e.g. confounders, we derive theoretical regression coefficients under simplistic models using the assumptions from Mendelian Randomization.

Mathematical interpretation of the GRS association after adjustment for a measured exposure

The causal diagram in Supplementary Figure 28a) represents a directed acyclic graph (DAG) for a structural equation model (SEM) that we define as follows:

- 1)  $g \sim \mathcal{N}(0,1)$
- 2)  $C \sim \mathcal{N}(0,1)$
- 3)  $N \sim \mathcal{N}(0, \sigma^2)$
- 4)  $E = \beta_0 \cdot g + \beta_1 \cdot C + N$
- 5)  $Y = \beta_3 \cdot E + \beta_2 \cdot C$

Here  $g$  represents a genetic instrument, in our case a genetic risk score,  $E$  represents the exposure,  $Y$  represents the outcome,  $C$  represents confounders that can affect the exposure and the outcome, and  $N$  represents residual variation in the exposure, which does not directly affect the outcome.

Notably, here we assume that there are no arrows directly from  $g$  to the confounders or the outcome, these assumptions are the 2nd and 3rd Mendelian Randomization (MR) assumptions.

Assuming that this model is correct, we can test for a causal effect of the exposure on the outcome by regressing  $Y$  on  $g$ . The genetic risk score is independent of the confounders, and since the confounders and the genetic risk score collide on the exposure, there is no bias from confounders in the estimate of the causal effect.

We are interested in assessing how much of the genetic association is mediated through the measured exposure. In this case, since we observe  $E$  perfectly, we would expect full mediation when we condition on  $E$ . However, when we condition on  $E$ , we open the backdoor path ( $g \rightarrow E \rightarrow C \rightarrow Y$ ).

By conditioning on  $E$  we also block the path directly from the exposure to the outcome, so if we regress  $Y$  on  $g$  and  $E$  jointly, we should observe an effect of  $g$  on  $Y$ . This is a form of collider bias since the variables  $g, E$  and  $C$  form a fork. Given the SEM we can compute the coefficients of the regression directly as:

$$\mathbb{E}[Y|\mathbf{E}, \mathbf{g}] = \left( \beta_3 + \left( \frac{\beta_2 \cdot \beta_1}{\beta_1^2 + \sigma^2} \right) \right) \cdot \mathbf{E} - \left( \frac{\beta_2 \cdot \beta_1}{\beta_1^2 + \sigma^2} \right) \cdot \beta_0 \cdot \mathbf{g}$$

Thus, the magnitude of the  $\mathbf{g}$  coefficient in the equation above scales in a complex manner with all the  $\beta$  parameters, except  $\beta_3$ , and  $\sigma^2$ . Since the formula for the coefficient of  $\mathbf{g}$  does not include  $\beta_3$ , we can say that the association is spurious and the association of  $\mathbf{g}$  is perfectly mediated through  $\mathbf{E}$ .

### Incomplete observation of the exposure

The exposure variable in the SEM is a theoretical construct, and it is very unlikely that we would ever observe such a variable perfectly. The graph in Supplementary Figure 28b) depicts a more realistic scenario, where we include the variable  $E_{obs}$  which is the observed exposure with noise; we can also think of it as an incomplete observation of  $E$ . An SEM for the graph in 1b) is the same as for the graph in 1a), except we add the following:

$$6) E_{obs} = E + N_0$$

where  $N_0$  is normally distributed with mean zero and variance  $\sigma_0^2$ . We can now perform the same exercise, where we regress  $Y$  on  $g$  and  $E_{obs}$  jointly.  $E_{obs}$  is a child of the fork, so we still open up the backdoor path through the colliders by conditioning on  $E_{obs}$ , however, now we are no longer completely blocking the path directly from the exposure to the outcome. This yields the following equation for the regression coefficients:

$$\mathbb{E}[Y|\mathbf{E}_{obs}, \mathbf{g}] = \left( \beta_3 \cdot \left( 1 - \frac{\sigma_0^2}{\beta_1^2 + \sigma^2 + \sigma_0^2} \right) + \left( \frac{\beta_2 \beta_1}{\beta_1^2 + \sigma^2 + \sigma_0^2} \right) \right) \cdot \mathbf{E}_{obs} + \left( \frac{\beta_3 \beta_0 \sigma_0^2 - \beta_2 \beta_1 \beta_0}{\beta_1^2 + \sigma^2 + \sigma_0^2} \right) \cdot \mathbf{g}$$

This equation is more general than the one for the first SEM and the first regression equation is a special case, as can be seen by setting  $\sigma_0^2$  to zero. The other limit, i.e., when  $\sigma_0^2$  tends to infinity is also interesting. In that case, the coefficient for  $\mathbf{g}$  tends to  $\beta_3\beta_0$ , which is the unadjusted effect, in which case we would interpret the results as none of the association is mediated through the measured exposure. We can also see that the added noise parameter further attenuates the effect of the collider bias, since  $\sigma_0^2$  appears in the denominator.

### Interpretation for BMI and diseases

In the case of BMI as an exposure and the outcomes that we investigate, it is likely that  $\beta_1$  and  $\beta_2$  have the same sign. In other words, if the confounders increase the BMI, they likely also increase the risk of the diseases. Thus, the total sign of the collider bias introduced by conditioning on BMI is negative. This is important, since it allows us to interpret the magnitude of the attenuation in the mediation analysis as an upper bound on disease risk, and that this bound is most likely a conservative upper bound.

The part of the association that can be attributed to the backdoor path is also scaled by the variance term  $\sigma^2 + \sigma_0^2$ , which further attenuates the potential bias via confounding.

Note that when we condition on the confounders, we completely block the backdoor path.

Practically, it is impossible to do this, both because we do not know all the confounders, but also because like BMI, we do not observe the confounders perfectly. If we condition on incomplete observation of the confounders, we can never completely close the backdoor path. We can assess the impact of adding potential confounders to the regression, to investigate the sensitivity of the parameter estimates in the regressions of the genetic risk score on the diseases with BMI as a covariate.

Adding additional variables can have other impacts on the results than just diminishing the effect that goes through the backdoor path. These variables could also include information that are not captured by the measured BMI.

### Mediation Analysis Using Exclusively Outliers

Since many of the outlier variants likely represent reverse causation, BMI measurements act as a collider for those variants. To exemplify this phenomenon, we have constructed a GRS exclusively from the outlier variants and redone the mediation analysis (Supplementary Figure 24). Note that the ORs are for 1 SD increase in BMI. Knee replacement is the only outcome that convincingly shows results somewhat consistent with the GRS in the main mediation analysis, (hip replacement and heart failure are somewhat consistent with large CIs), since BMI is likely acting on knee replacement, through sheer mechanical force on the joint, it is likely that the underlying mechanism that creates diversity in BMI is less important in that case.

Most of the other diseases do not associate with this outlier GRS and when we condition on BMI, the effect tends away from the null, this is likely a spurious association that stems from conditioning on a collider. This is most drastic in the case of T2D where we see an association with an effect ( $\log(\text{OR}) < 0$ ) of opposite sign to the GRS and the adjusted effect is even further away from the null.

### Adjustment for smoking

To adjust for smoking we included three smoking-related terms in the regression models. Smoking is a complex behavioral phenotype, and we wanted to adjust for heavy smoking. The three terms were:

- Smoking status, which is a factor variable that can take the values current, previous and never.
- Pack years, which was transformed to take the value pack years minus twenty if pack years was less than 20, zero otherwise.
- Years since stopped smoking, this variable was transformed in the same way as pack years.

## Supplementary Figures

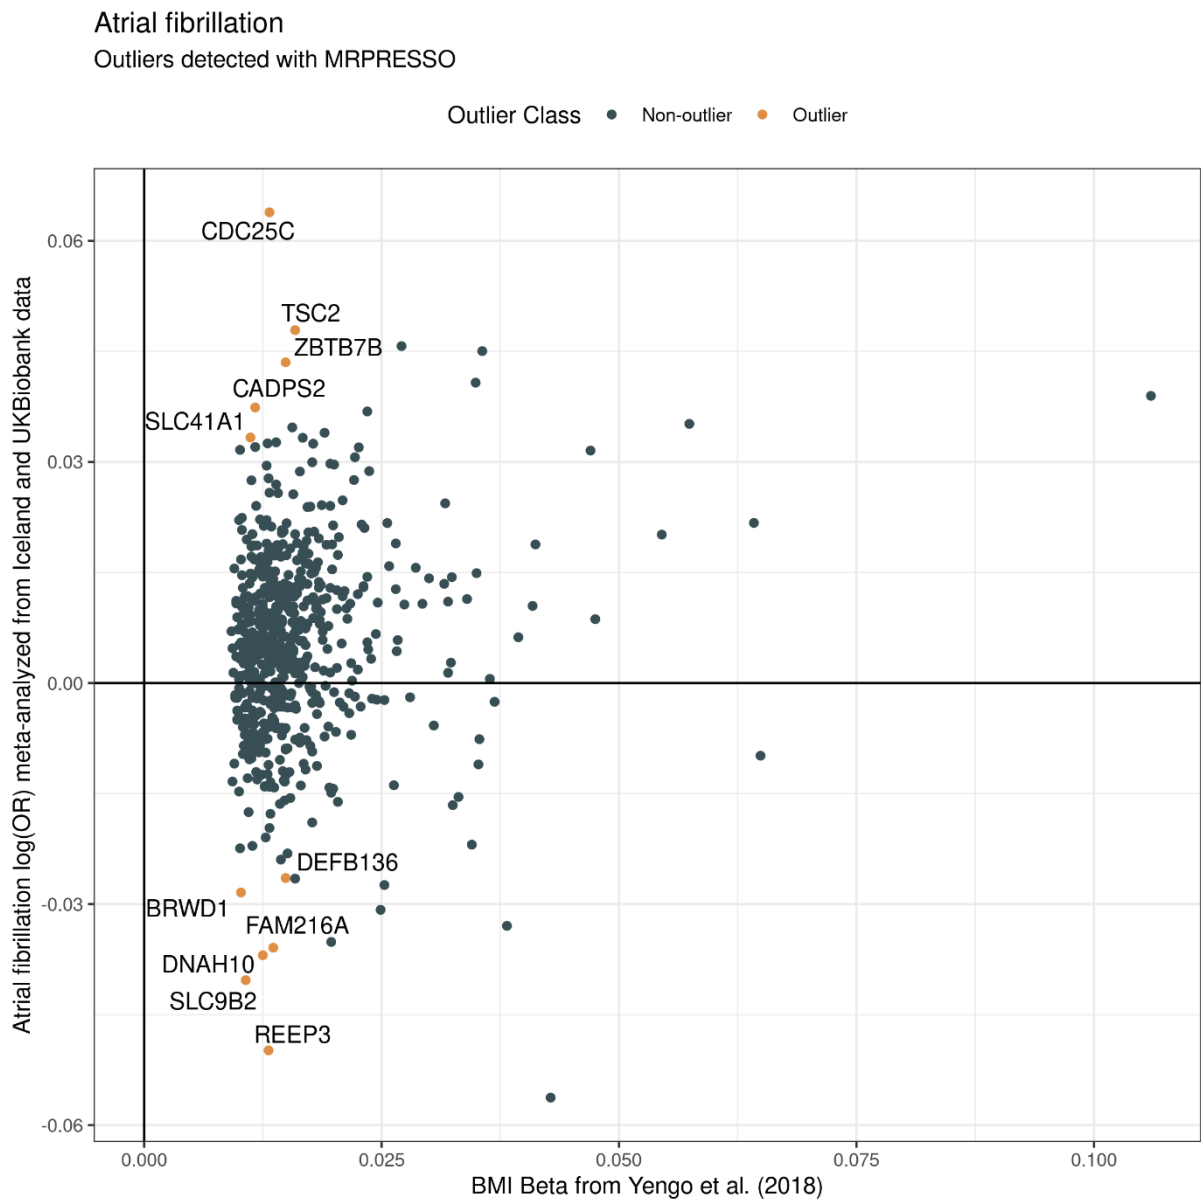

Supplementary Figure 1 Scatter plot showing effects of BMI variants on BMI on the x-axis and their effects (log(OR)) on atrial fibrillation on the y-axis. Outliers detected with MRPRESSO are colored in orange and annotated with the closest gene.

Chronic kidney disease  
Outliers detected with MRPRESSO

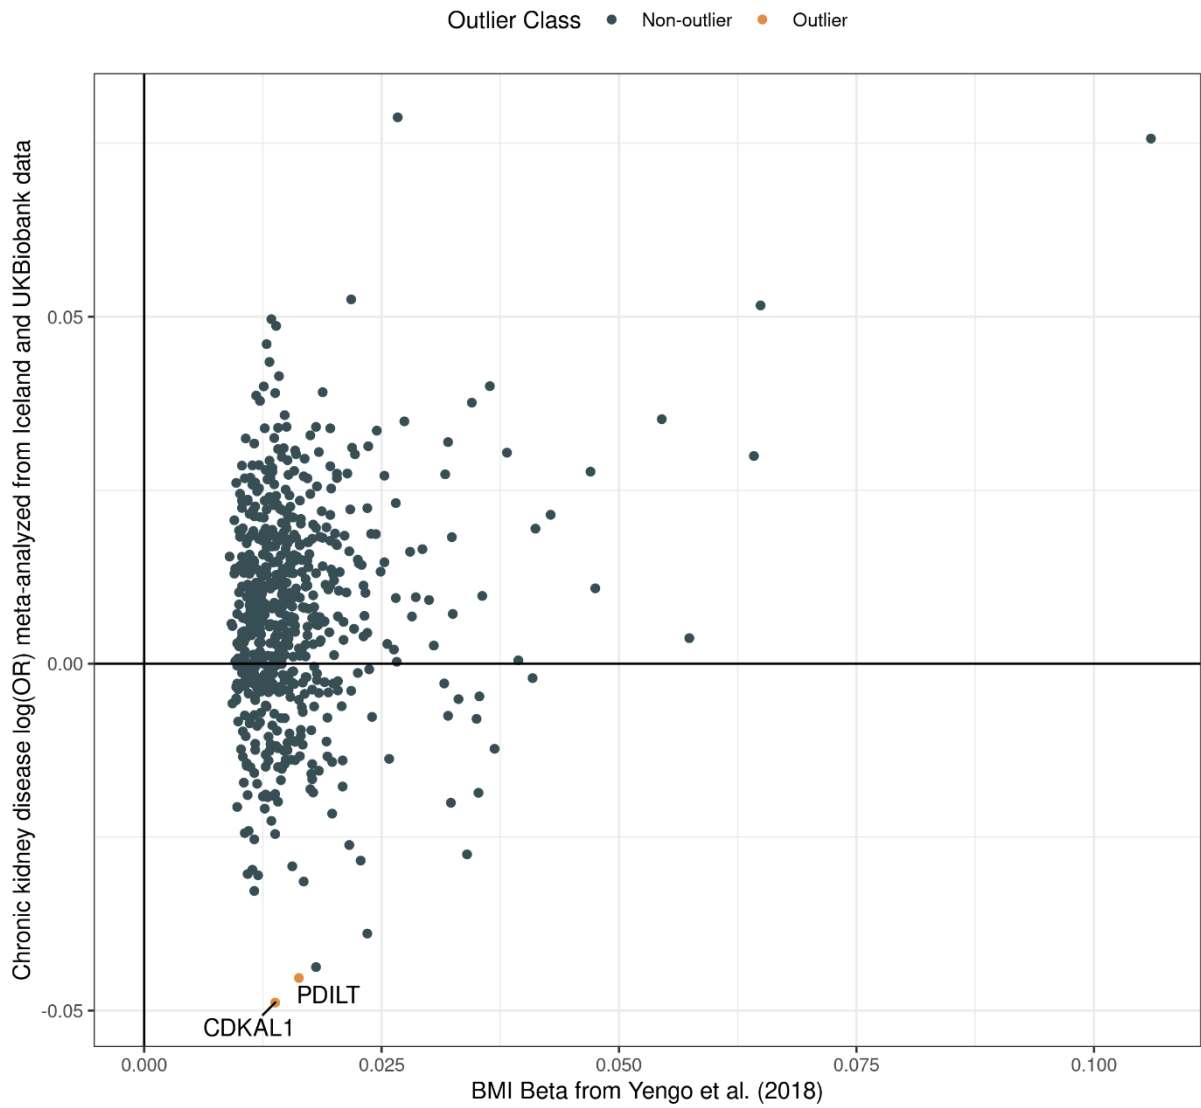

Supplementary Figure 2 Scatter plot showing effects of BMI variants on BMI on the x-axis and their effects ( $\log(OR)$ ) on chronic kidney disease on the y-axis. Outliers detected with MRPRESSO are colored in orange and annotated with the closest gene.

Fatty liver disease  
Outliers detected with MRPRESSO

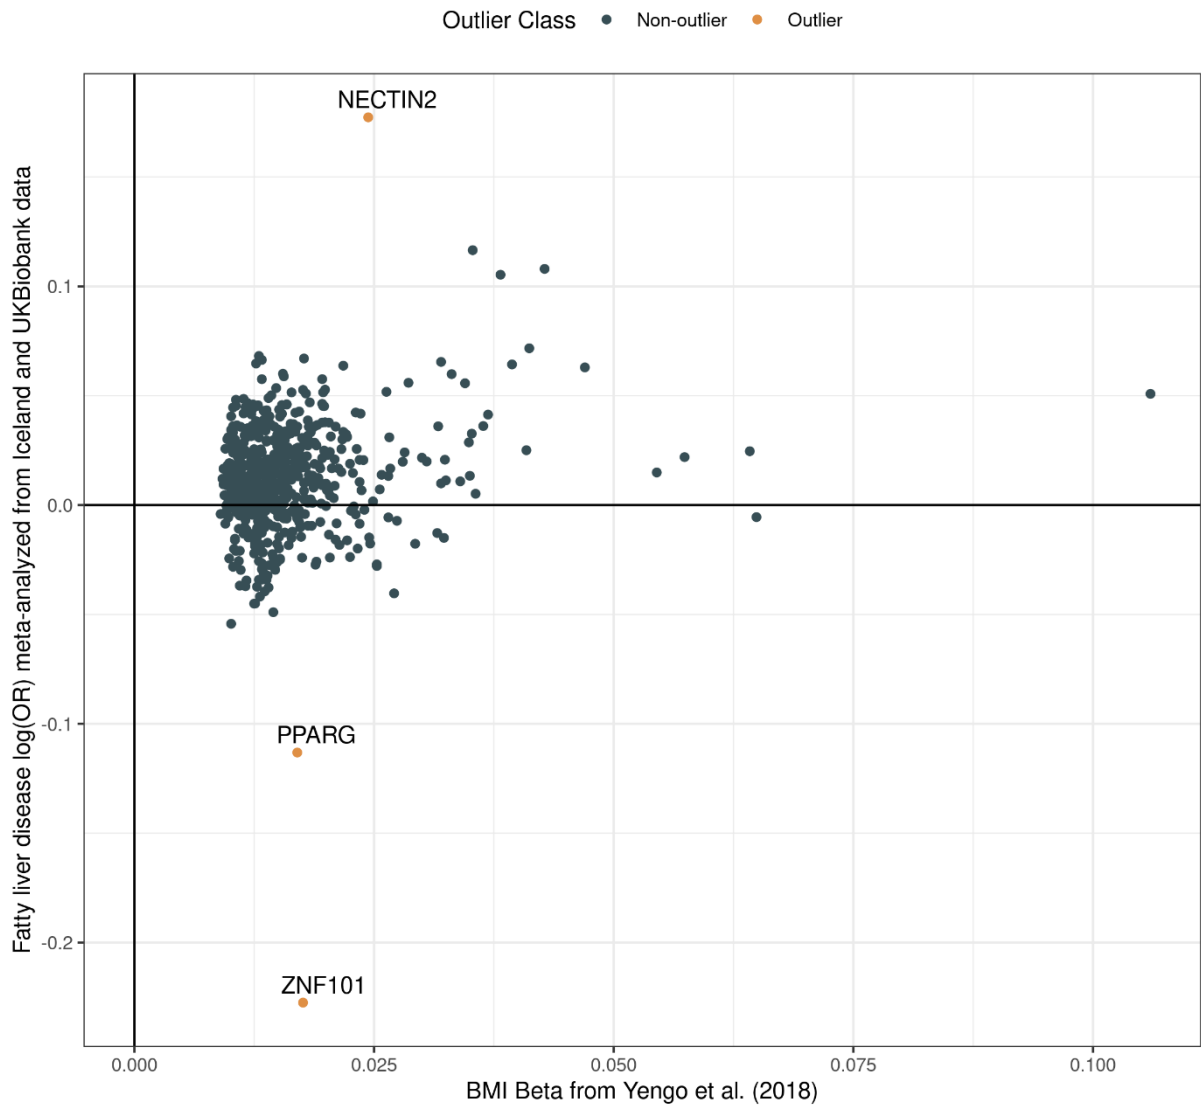

Supplementary Figure 3 Scatter plot showing effects of BMI variants on BMI on the x-axis and their effects ( $\log(OR)$ ) on fatty liver disease on the y-axis. Outliers detected with MRPRESSO are colored in orange and annotated with the closest gene.



Glucose intolerance  
Outliers detected with MRPRESSO

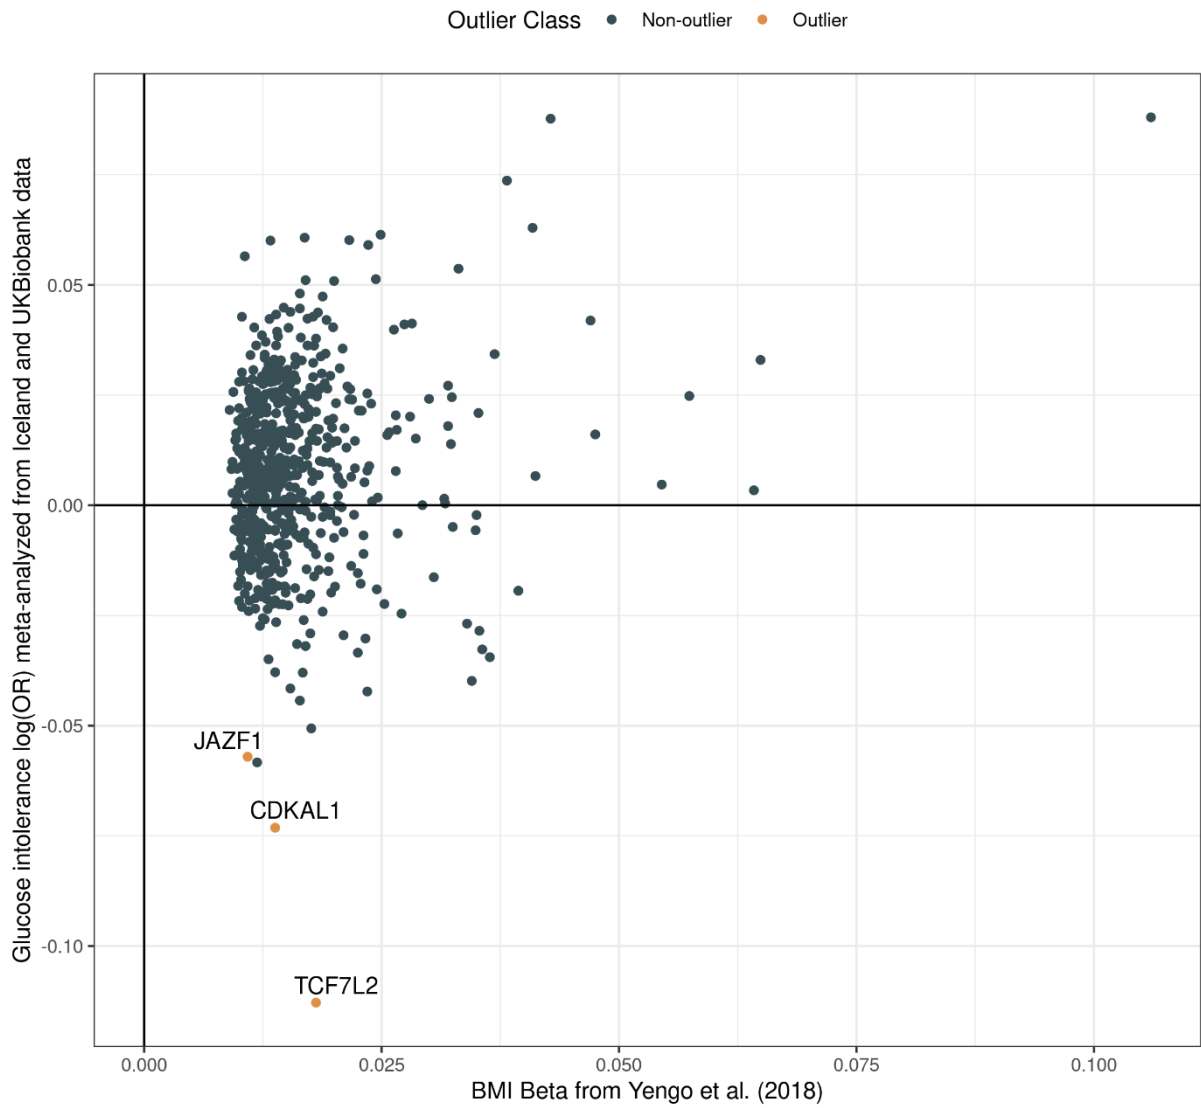

Supplementary Figure 4 Scatter plot showing effects of BMI variants on BMI on the x-axis and their effects ( $\log(OR)$ ) on glucose intolerance on the y-axis. Outliers detected with MRPRESSO are colored in orange and annotated with the closest gene.

## Heart failure

Outliers detected with MRPRESSO

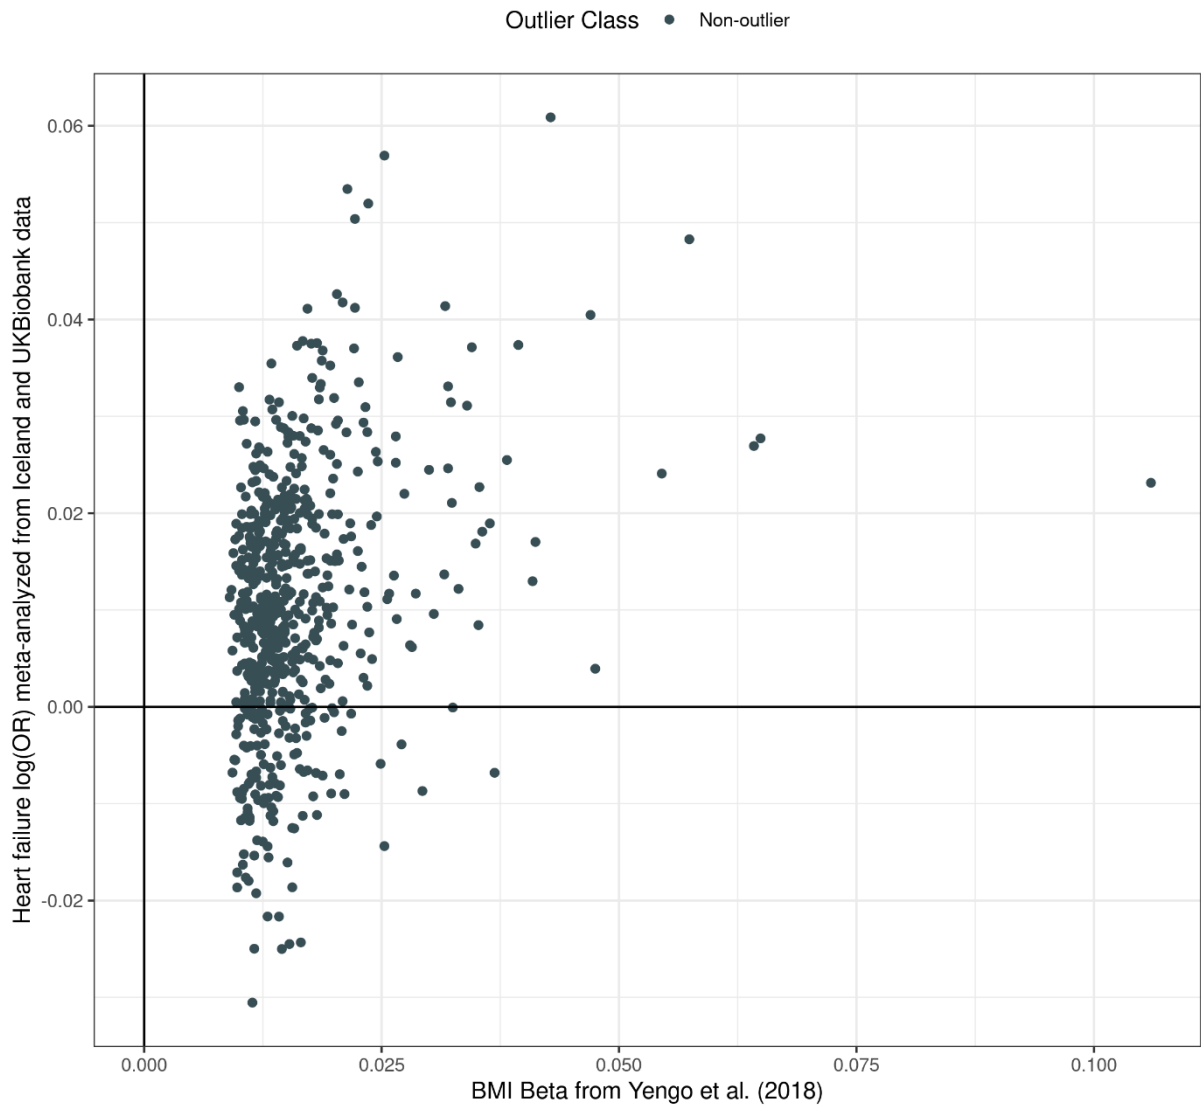

Supplementary Figure 5 Scatter plot showing effects of BMI variants on BMI on the x-axis and their effects ( $\log(OR)$ ) on heart failure on the y-axis. Outliers detected with MRPRESSO are colored in orange and annotated with the closest gene.

Hip replacement  
Outliers detected with MRPRESSO

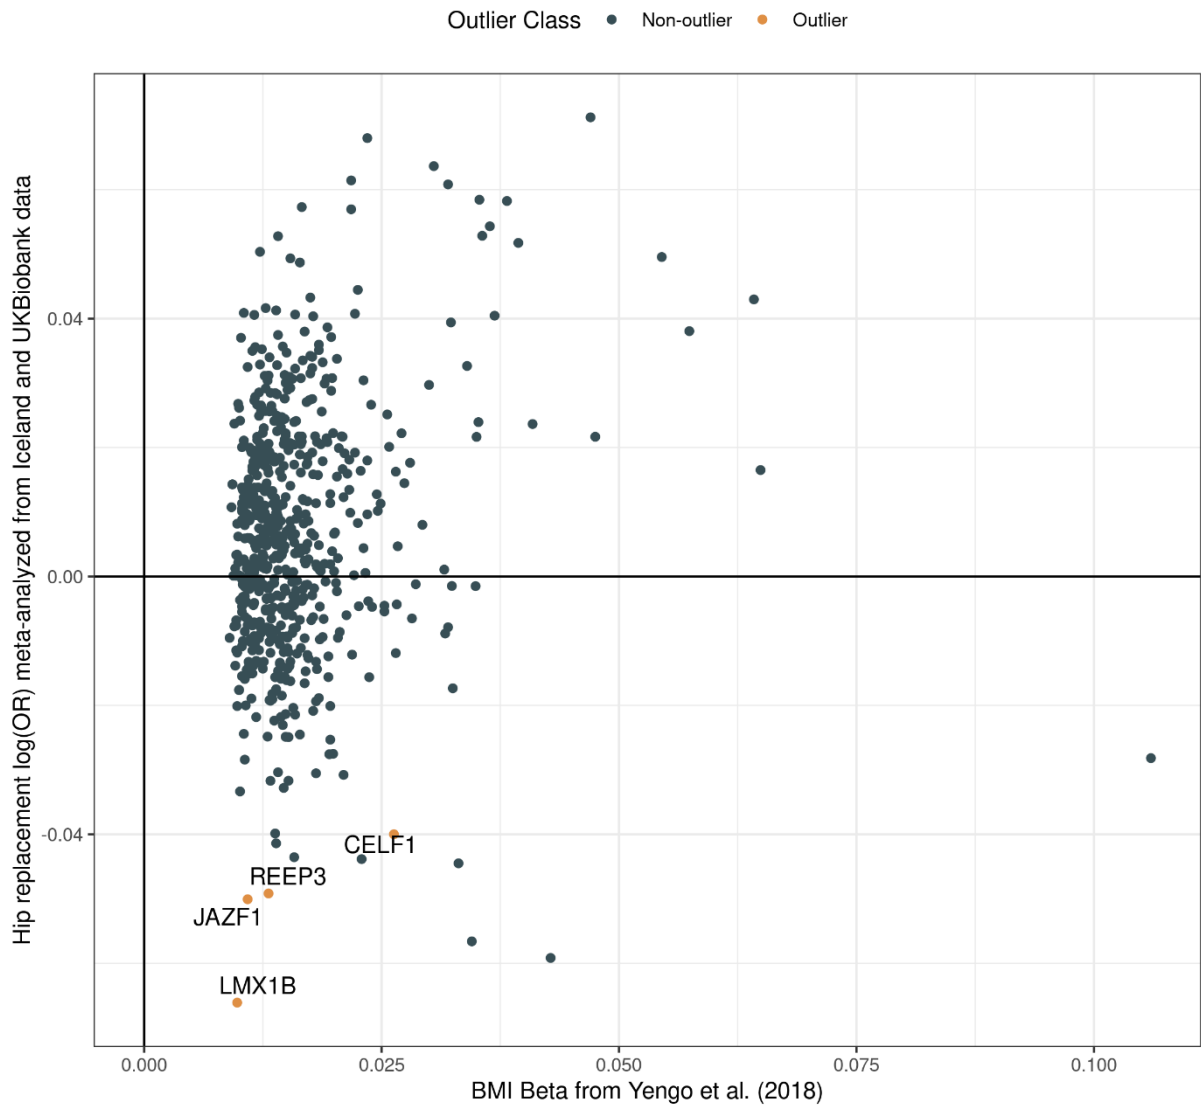

Supplementary Figure 6 Scatter plot showing effects of BMI variants on BMI on the x-axis and their effects ( $\log(OR)$ ) on hip replacement on the y-axis. Outliers detected with MRPRESSO are colored in orange and annotated with the closest gene.

Knee replacement  
Outliers detected with MRPRESSO

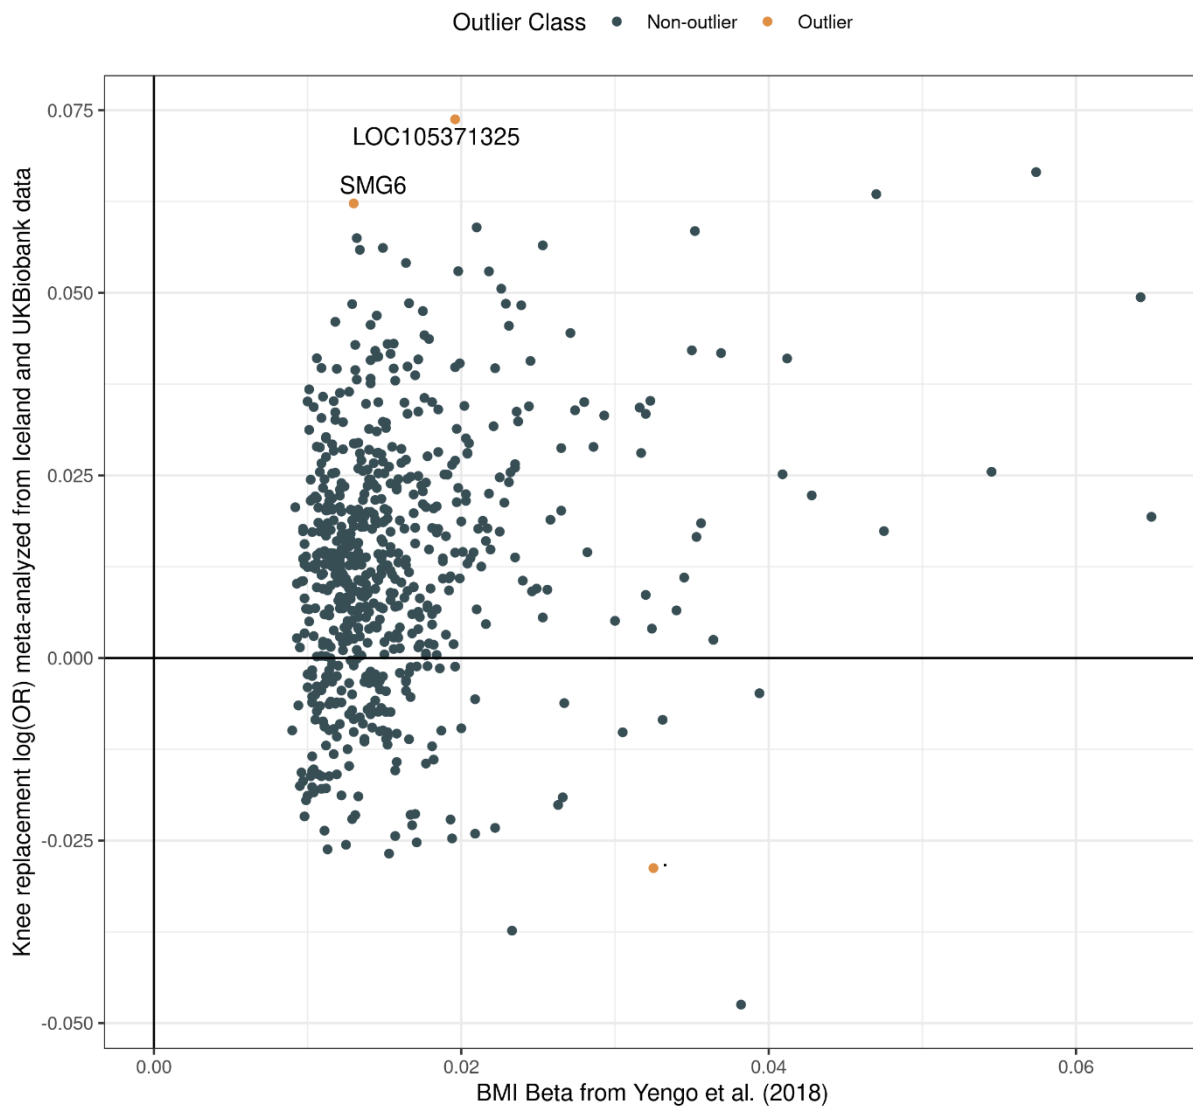

Supplementary Figure 7 Scatter plot showing effects of BMI variants on BMI on the x-axis and their effects ( $\log(OR)$ ) on knee replacement on the y-axis. Outliers detected with MRPRESSO are colored in orange and annotated with the closest gene.

Myocardial Infarction  
Outliers detected with MRPRESSO

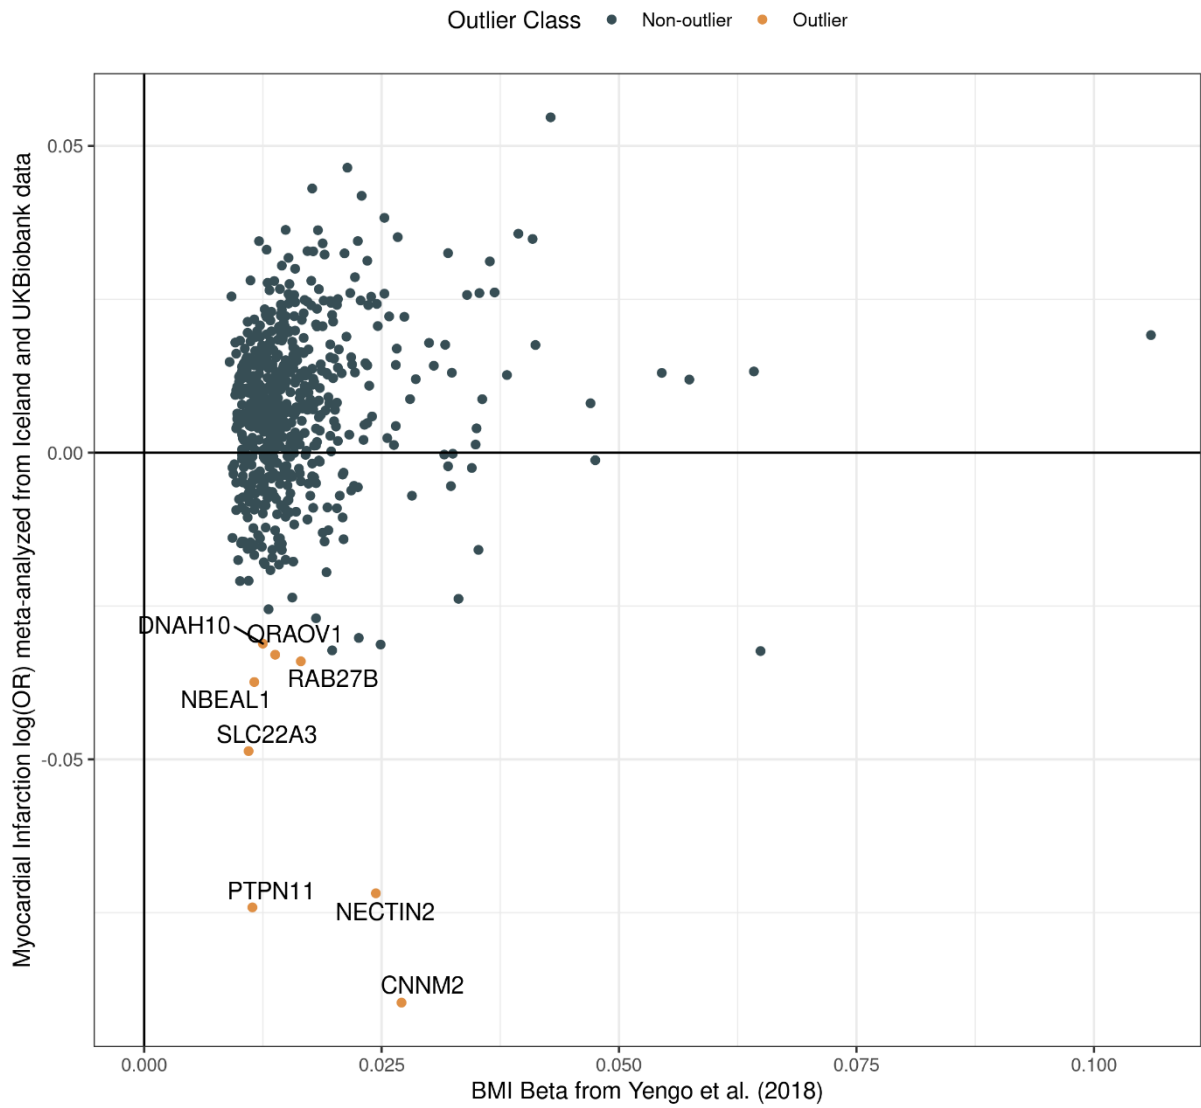

Supplementary Figure 8 Scatter plot showing effects of BMI variants on BMI on the x-axis and their effects ( $\log(OR)$ ) on myocardial infarction on the y-axis. Outliers detected with MRPRESSO are colored in orange and annotated with the closest gene.

## Stroke

Outliers detected with MRPRESSO

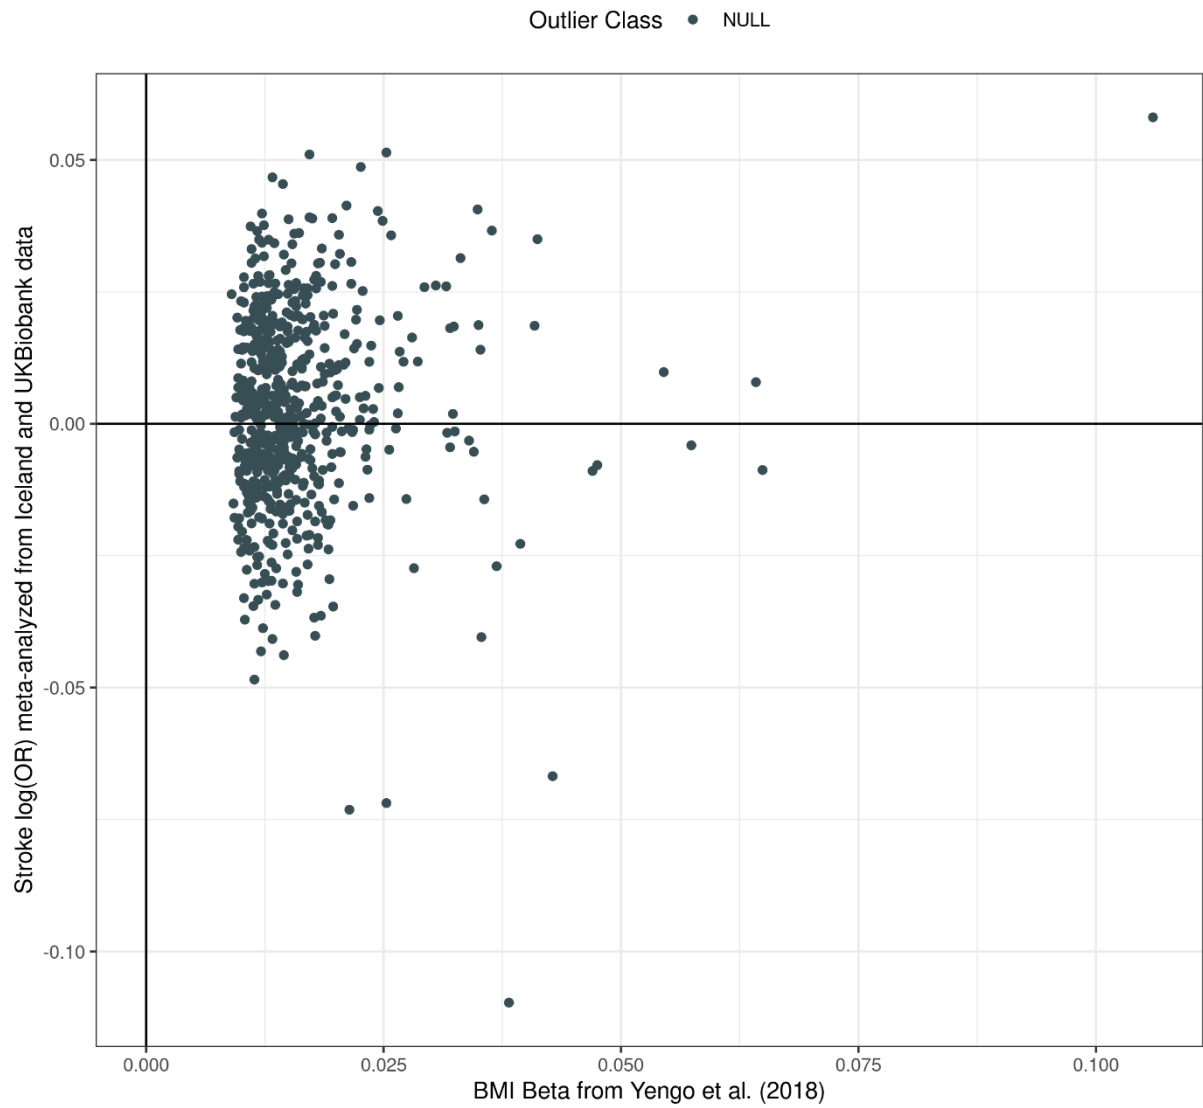

Supplementary Figure 9 Scatter plot showing effects of BMI variants on BMI on the x-axis and their effects ( $\log(\text{OR})$ ) on stroke on the y-axis. Outliers detected with MRPRESSO are colored in orange and annotated with the closest gene.

## Type 2 diabetes E11

Outliers detected with MRPRESSO

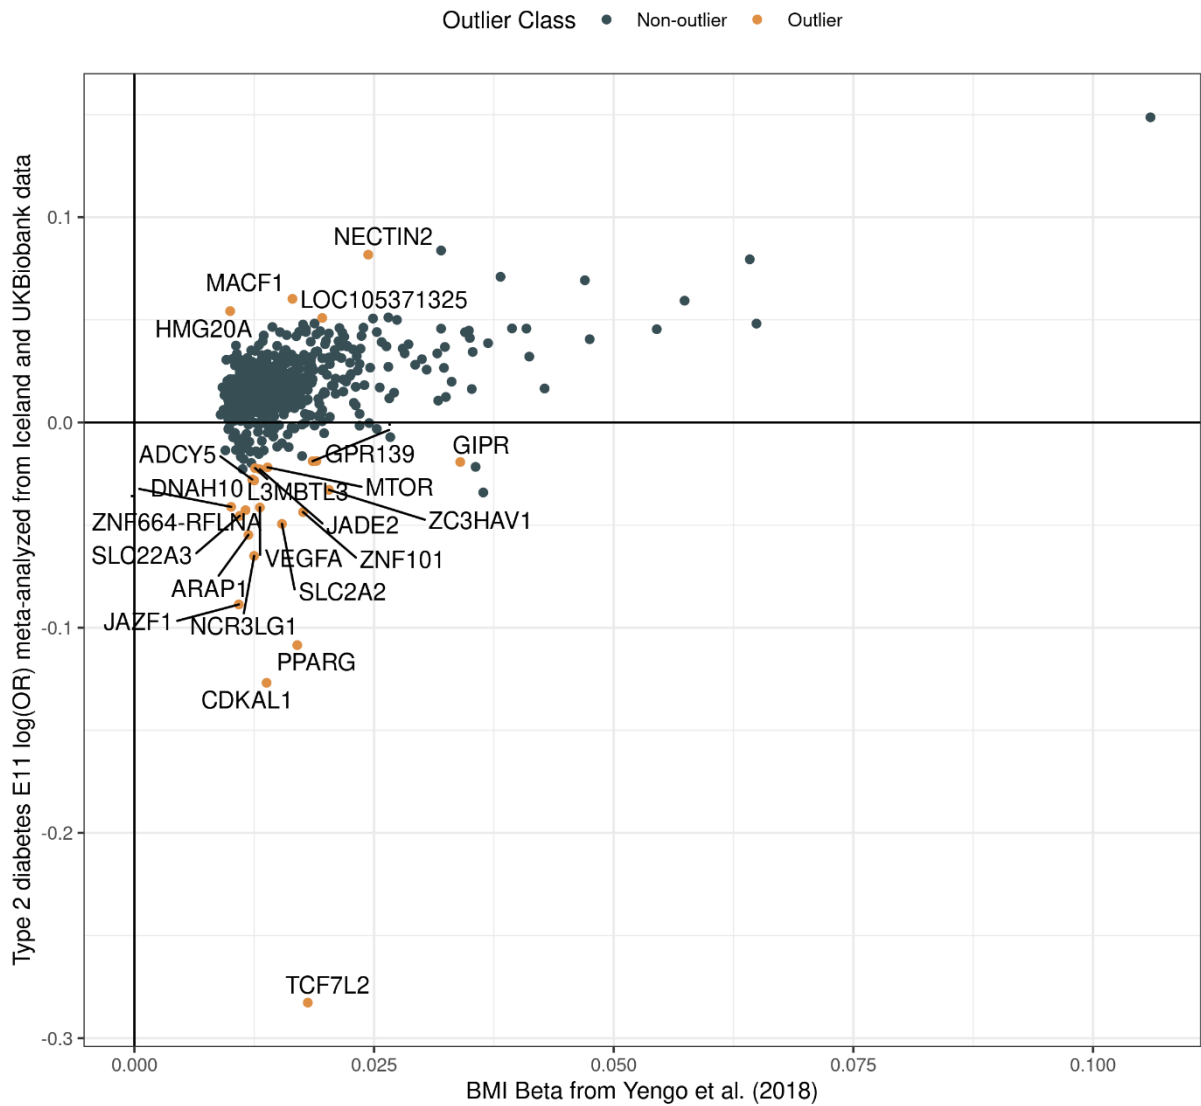

Supplementary Figure 10 Scatter plot showing effects of BMI variants on BMI on the x-axis and their effects (log(OR)) on type 2 diabetes on the y-axis. Outliers detected with MRPRESSO are colored in orange and annotated with the closest gene.

Proportion of BMI-GRS Association Mediated through BMI by Population and Diseases  
 Upper CIs clipped at 1.5

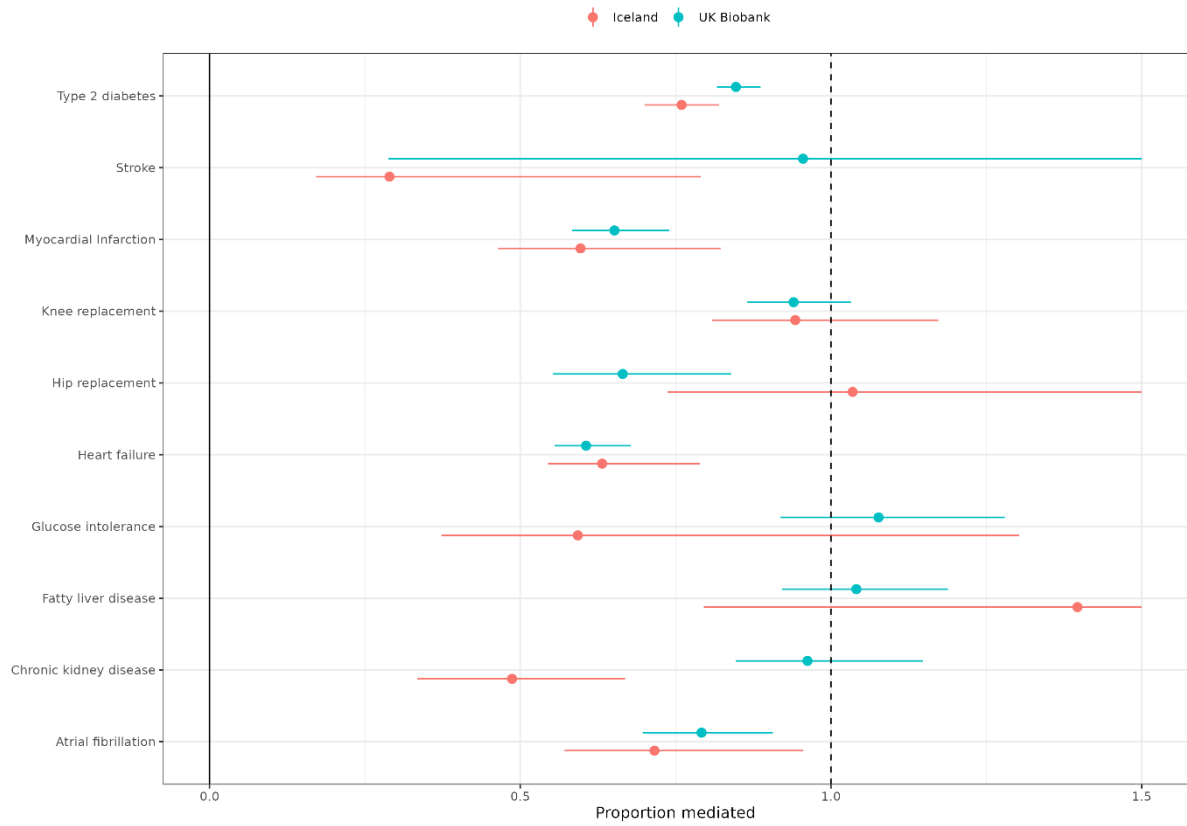

Supplementary Figure 11 Proportion of BMI-GRS association mediated by BMI itself. We compare these values between cohorts, values estimated in Icelandic data in red, and values estimated from UK data in blue. The confidence intervals are created by running the mediate function from the R package mediation, with the quasi-Bayesian method using 200 simulations. The underlying data is in supplementary table 4.



Adjusting for Additional Covariates  
 Comparing effect of including extra covariates for indirect effect in UK Biobank data

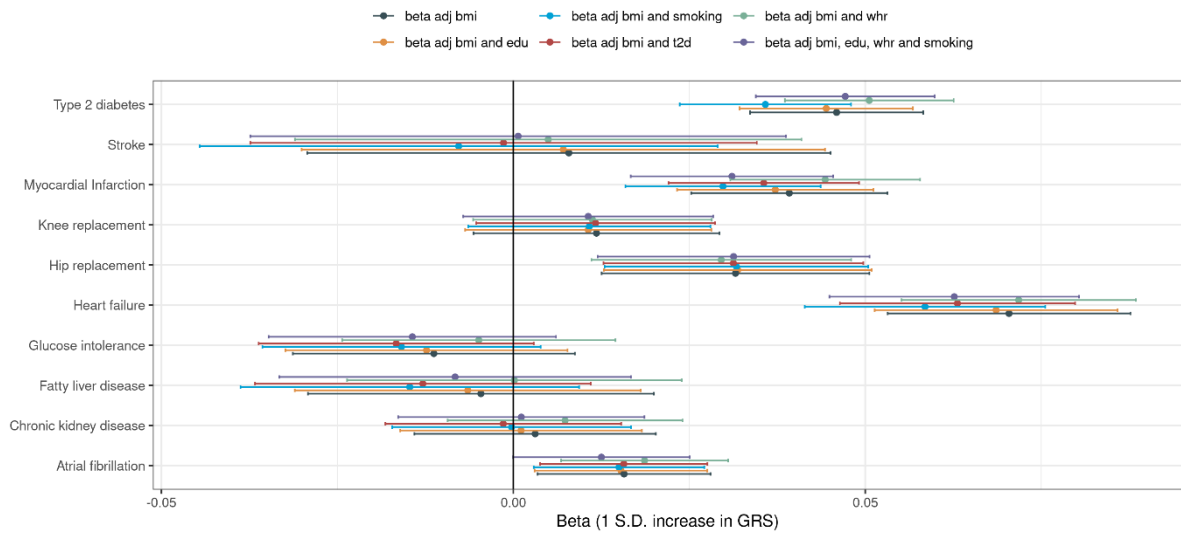

Supplementary Figure 12 Comparing effects of the BMI-GRS on diseases/conditions when including measured BMI in the model in addition to other potential confounders. The effects have not been scaled, so the unit represents a standard deviation increase in the GRS. The points represent point estimates for the GRS from logistic regression and the error bars represent 95% confidence intervals.

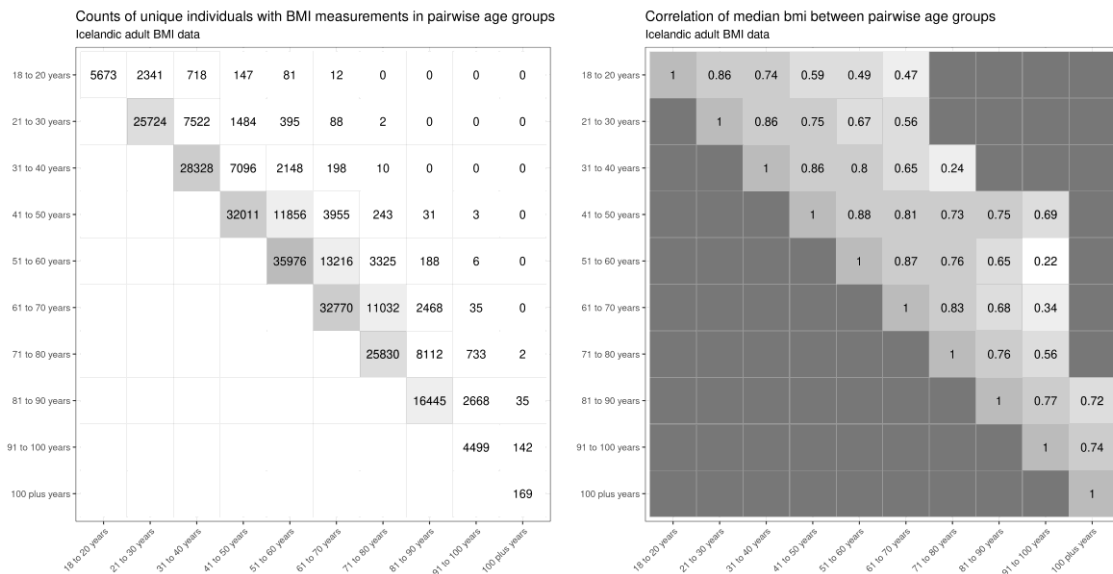

Supplementary Figure 13 Summary of repeated BMI measurements in the Icelandic dataset. On the left panel we quantify the number of individuals who have at least one BMI measurement according to different age strata, where each individual is only counted once in each unique block. On the right we have the correlation of the raw BMI measures for each individual, using the median in case of multiple measurements for the same individual within an age strata.

## Correlation of BMI measured 5 and 10 years apart in Icelandic data

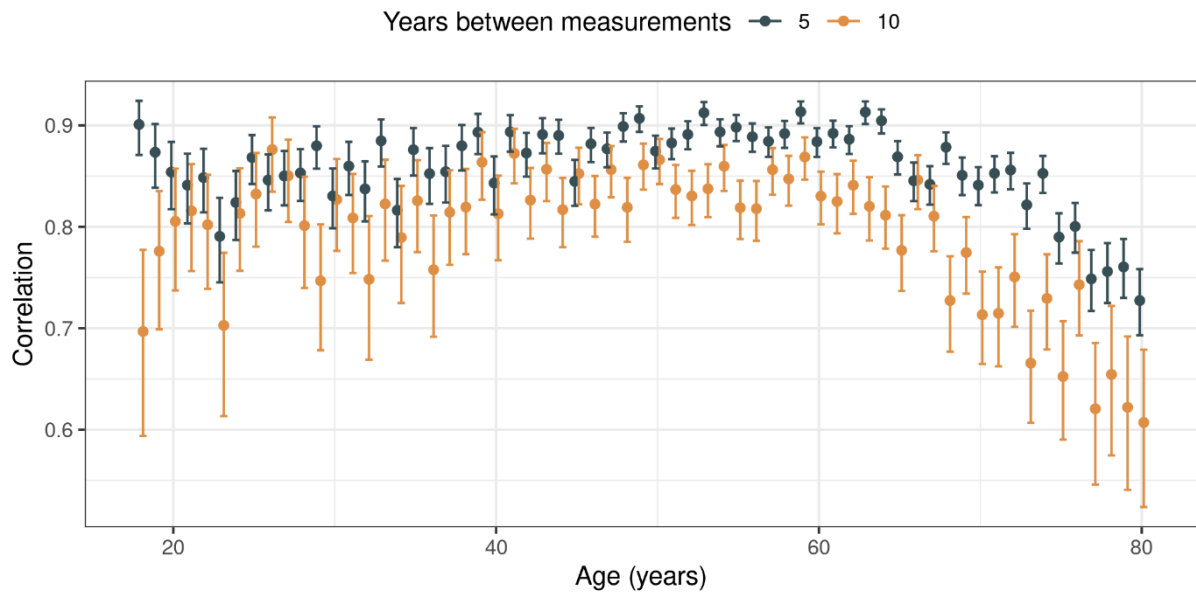

Fraction of variance explained of BMI-GRS in BMI phenotype in UK Biobank by age groups  
Confidence intervals produced via bootstrap

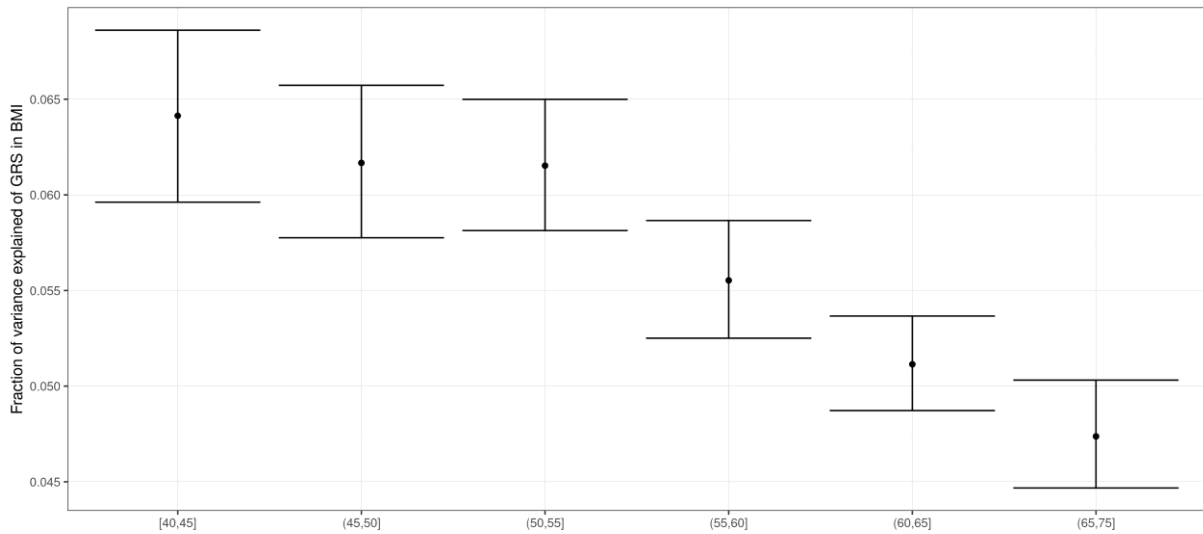

Supplementary Figure 14 Upper panel: Temporal Pearson correlations of BMI measurements in the Icelandic data with 95% confidence intervals. For each specific age, we looked for all individuals that had a BMI measurement exactly 5 and 10 years later, we subsequently computed the Pearson correlation of the BMI at the specific age, with the BMI 5 and 10 years later. In case of multiple measurements at the same age for an individual we used the median. We observe a decline in correlation after 60. Lower panel: Variance explained by the BMI-GRS without outliers in the UK Biobank BMI phenotype by age at recruitment groups, the points represent the median from a bootstrap, and the error bars represent a 95% bootstrap confidence interval.

## Sex stratified mediation analysis UKBiobank data Adjusted for Yob and PCs

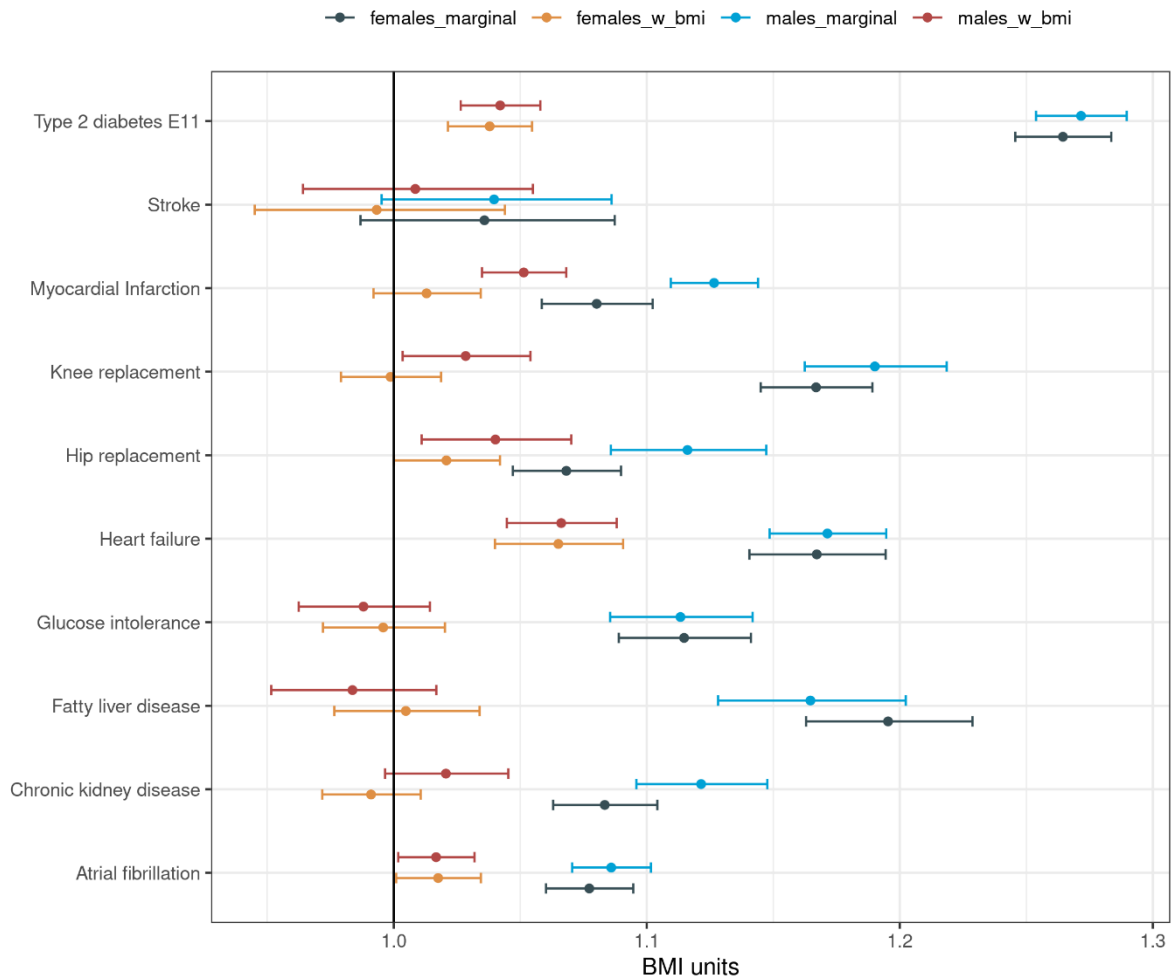

Supplementary Figure 15 Main association results from the UK stratified by sex. The BMI-GRS (score without outliers) is scaled specifically within each sex such that an increase by one unit corresponded to a one unit ( $\text{kg}/\text{m}^2$ ) increase in BMI, thus the ORs correspond to a 1 unit increase in BMI (Supplementary Table 5b). The blue and black points and error-bars show the disease association of the BMI-GRS adjusted for year of birth and 20 genetic principal components, the orange and red points and error-bars show the corresponding association when BMI has been added as a covariate. The error bars correspond to a 95% confidence interval for the parameter and the points represent ORs estimated with logistic regression. See supplementary table 5a for details.

### BMI-PRS Associations in Iceland with and w/o BMI itself Adjusted for sex, yob and 20 PCs

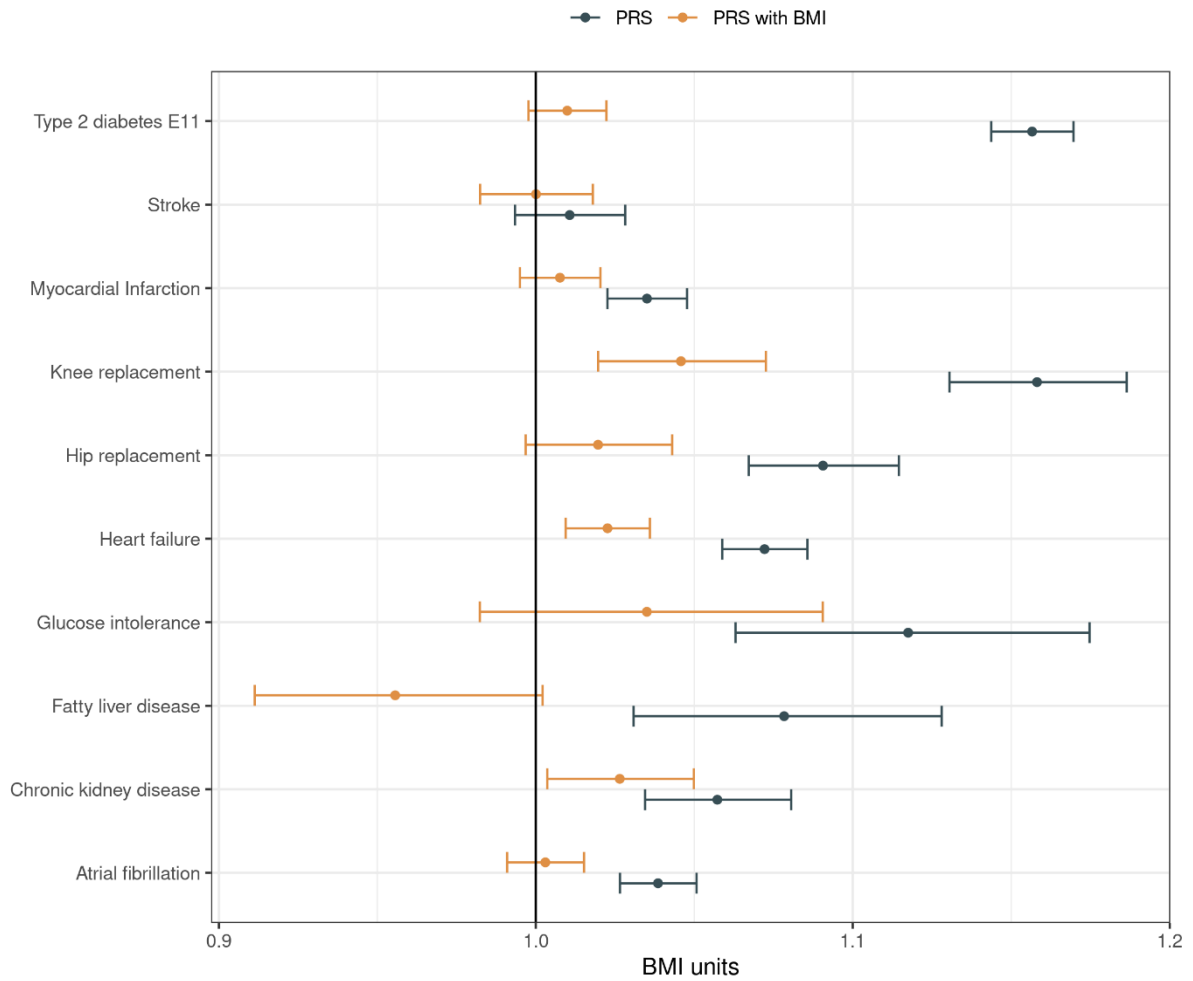

Supplementary Figure 16 Mediation analysis repeated in the Icelandic data using the PRS a liberal score made with 611K markers. The error bars correspond to a 95% confidence interval for the parameter and the points represent ORs from logistic regression.

### BMI-PRS Associations in UKB with and w/o BMI itself Adjusted for sex, yob and 20 PCs

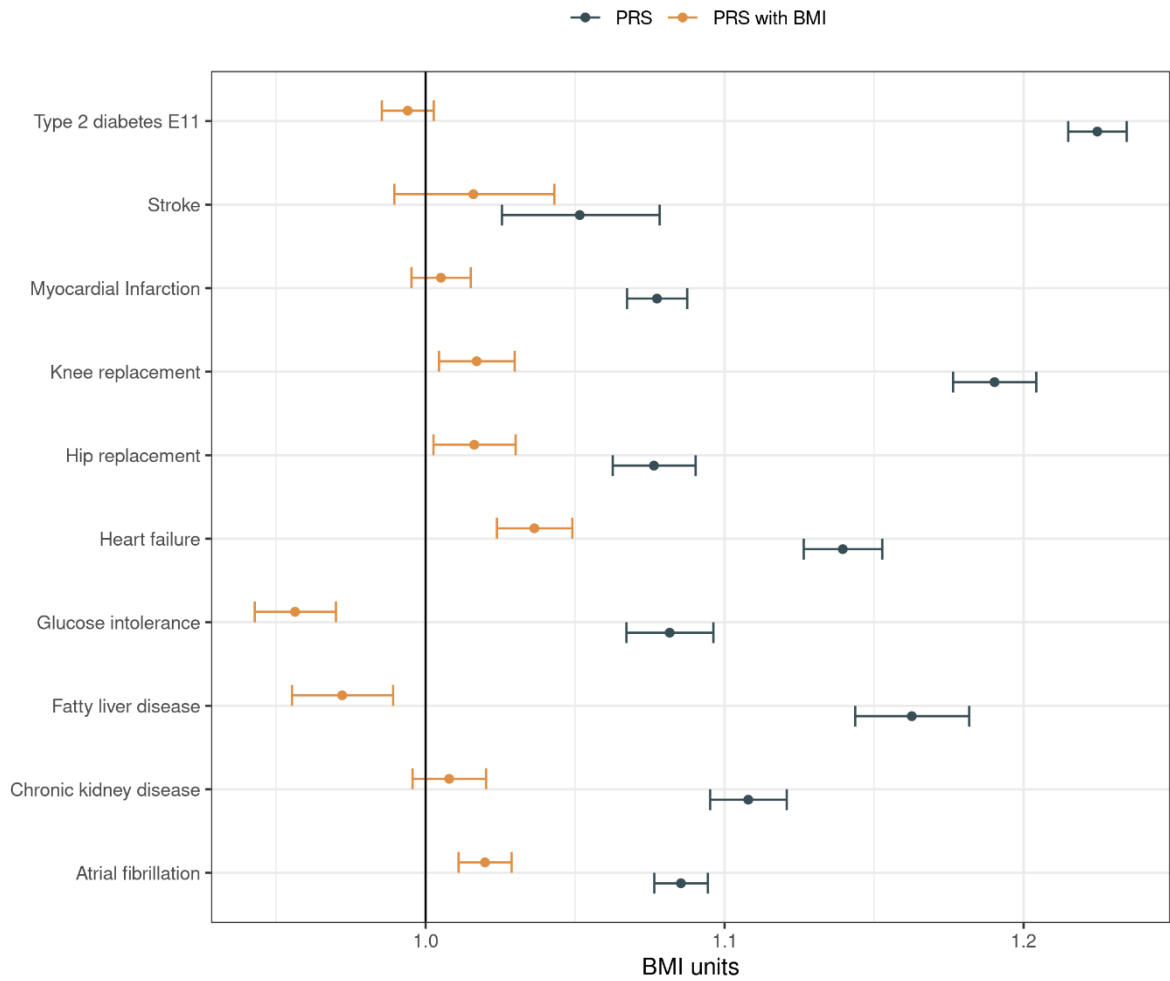

Supplementary Figure 17 Mediation analysis repeated in the UK data using the PRS a liberal score made with 611K markers.

The error bars correspond to a 95% confidence interval for the parameter and the points represent ORs from logistic regression.

BMI-GRS-with-Outliers Associations in Iceland with and w/o BMI itself  
Adjusted for sex, yob and 20 PCs

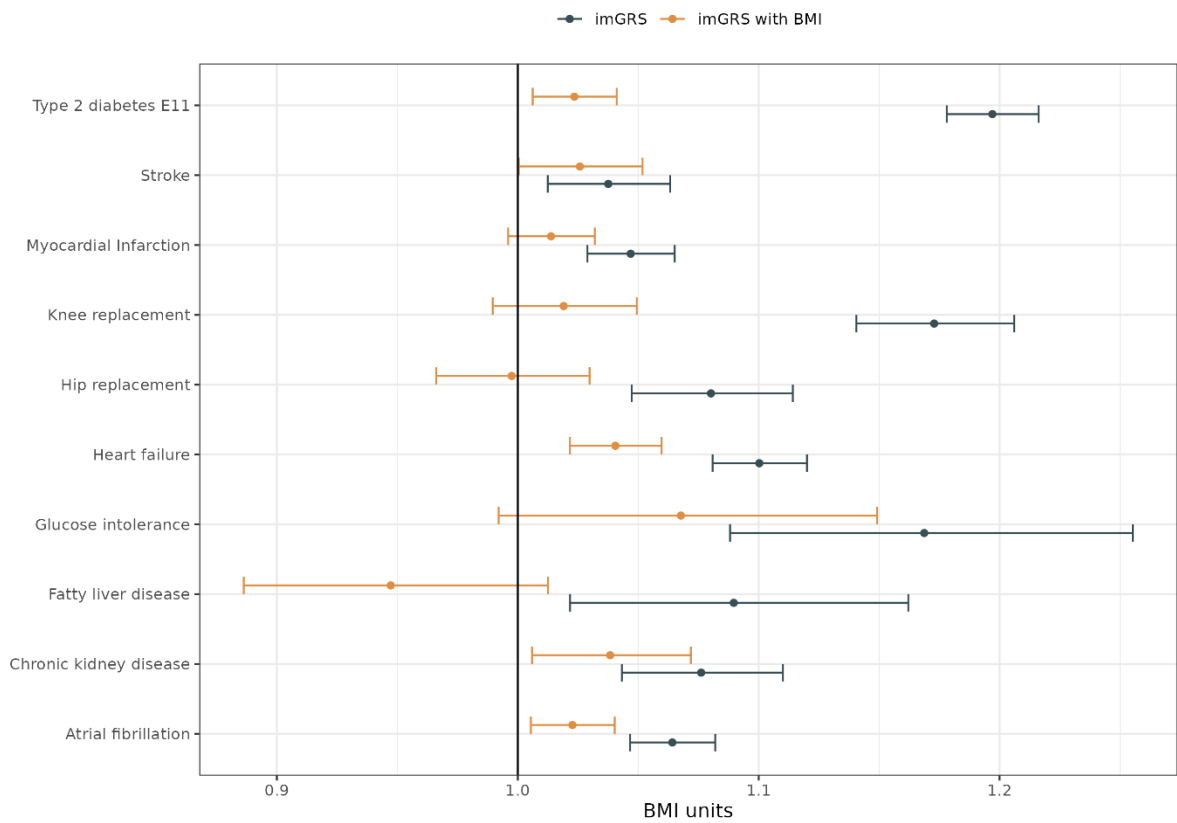

Supplementary Figure 18 Mediation analysis repeated in the Icelandic data using the BMI-GRS-with-Outliers which consists of all independent markers (liberal GRS score and outliers). The error bars correspond to a 95% confidence interval for the parameter and the points represent ORs from logistic regression.

BMI-GRS-with-Outliers Associations in UKB with and w/o BMI itself  
Adjusted for sex, yob and 20 PCs

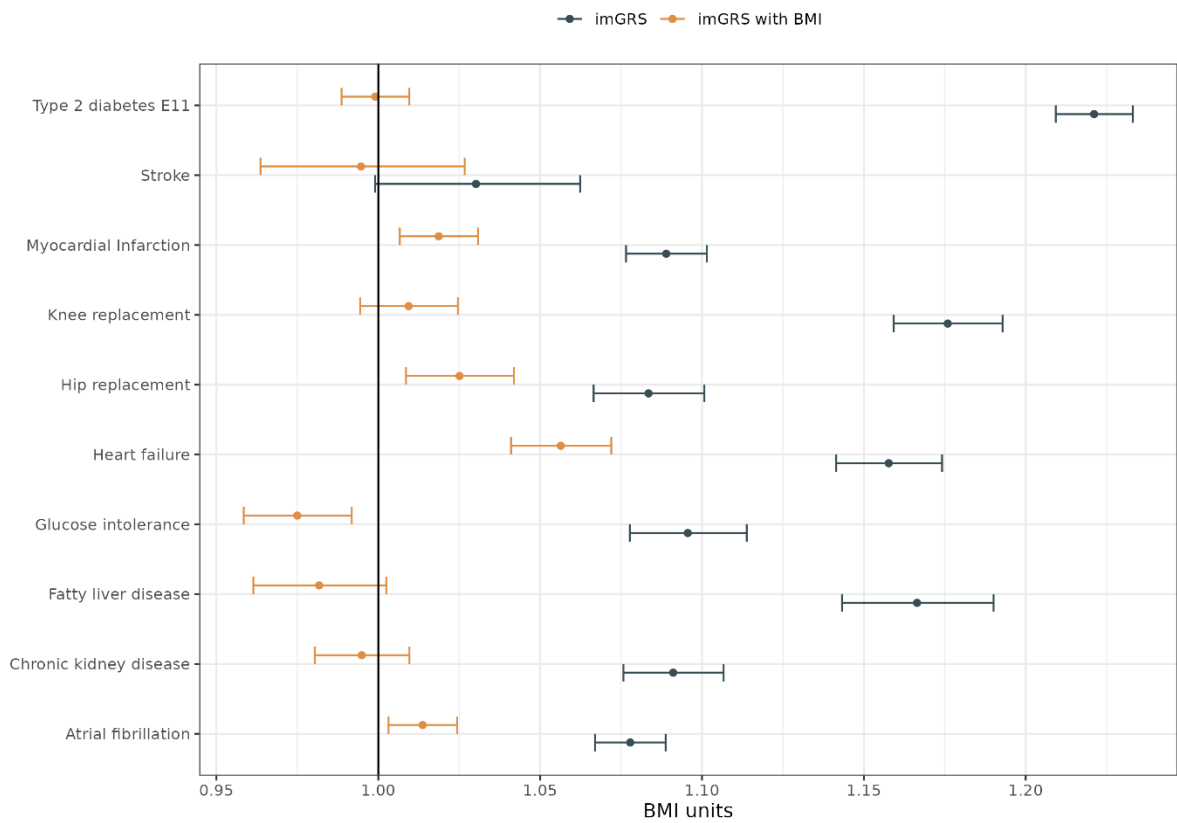

Supplementary Figure 19 Mediation analysis repeated in the UK data using the BMI-GRS-with-Outliers which consists of all independent markers (liberal GRS score and outliers). The error bars correspond to a 95% confidence interval for the parameter and the points represent ORs from logistic regression.

Comparing proportion mediated by scores  
UK data

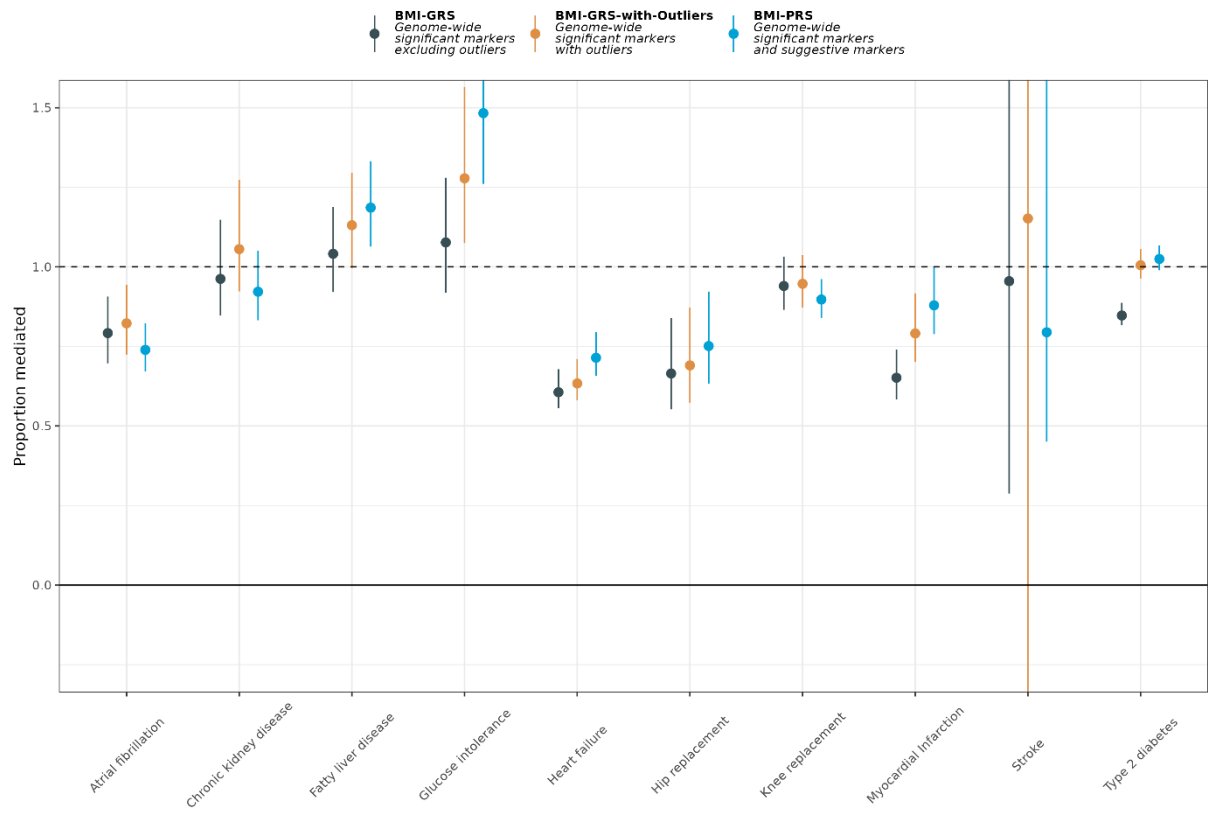

Supplementary Figure 20 Proportion mediated by BMI for the different scores in UK data (Supplementary Table 4).



Comparing proportion mediated by scores  
Icelandic data

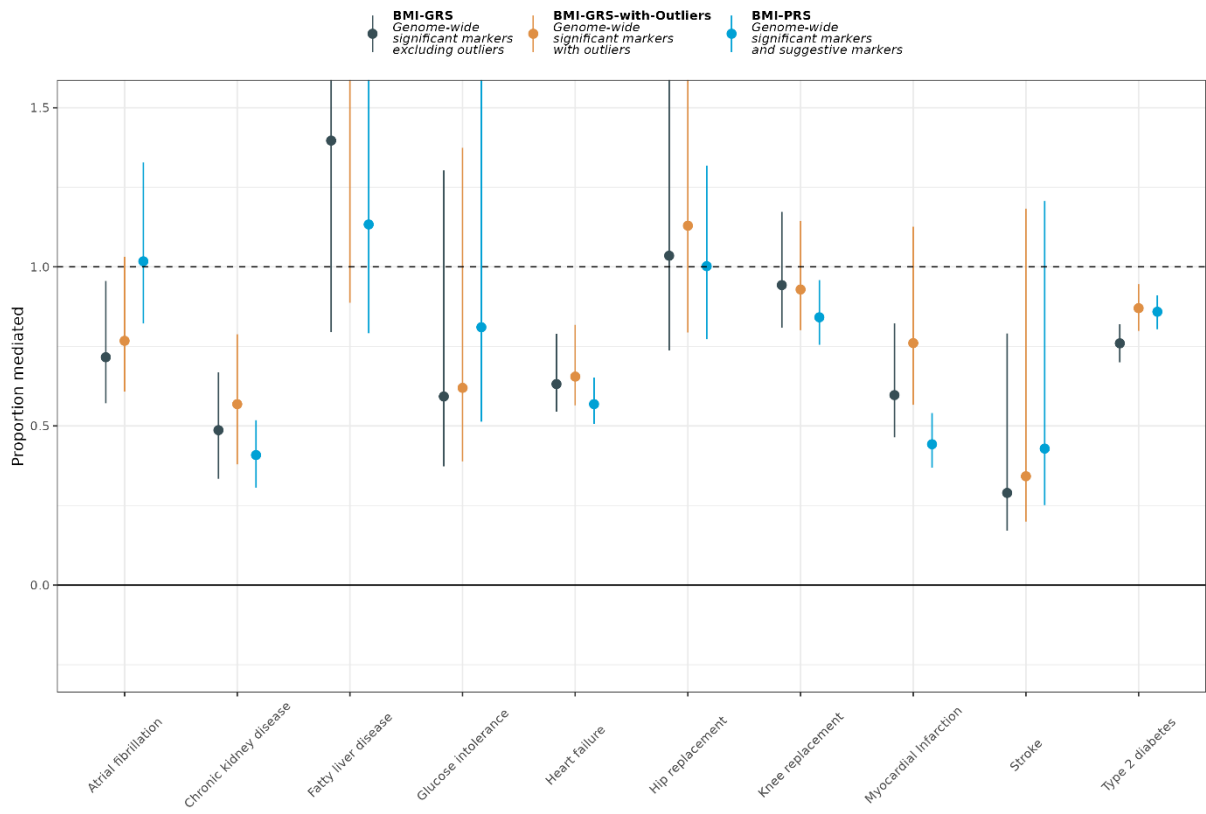

Supplementary Figure 21 Proportion mediated by BMI for the different scores in Icelandic data (Supplementary Table 4).

### Proportion of Heart Failure in UKBiobank by BMI centiles

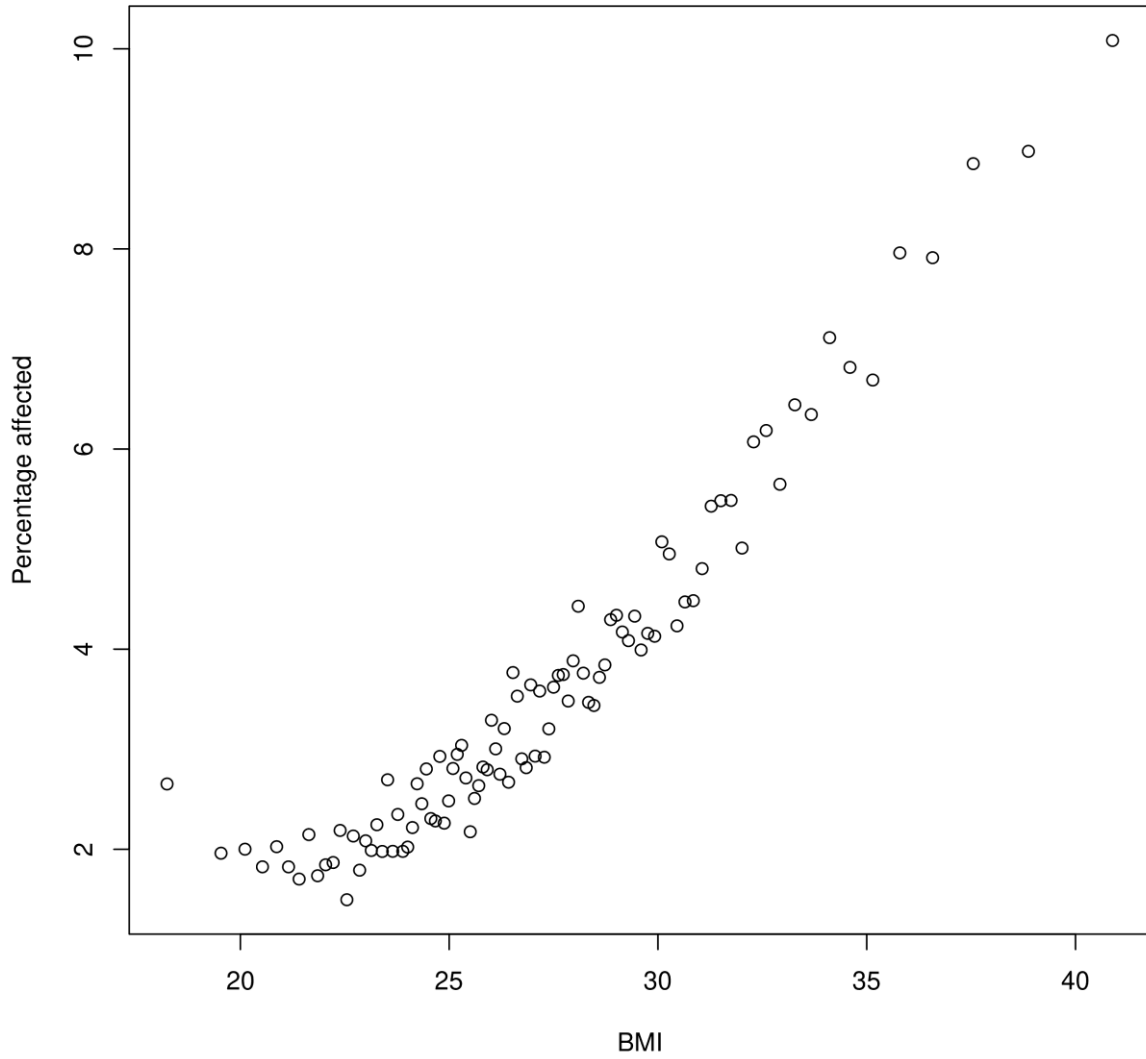

Supplementary Figure 22 Proportion of individuals diagnosed with heart failure by BMI percentile, where BMI is the BMI at first visit to the UK Biobank.

## Comparing associations when excluding low and high BMI

Results from UKBiobank data, strata defined by BMI at first visit

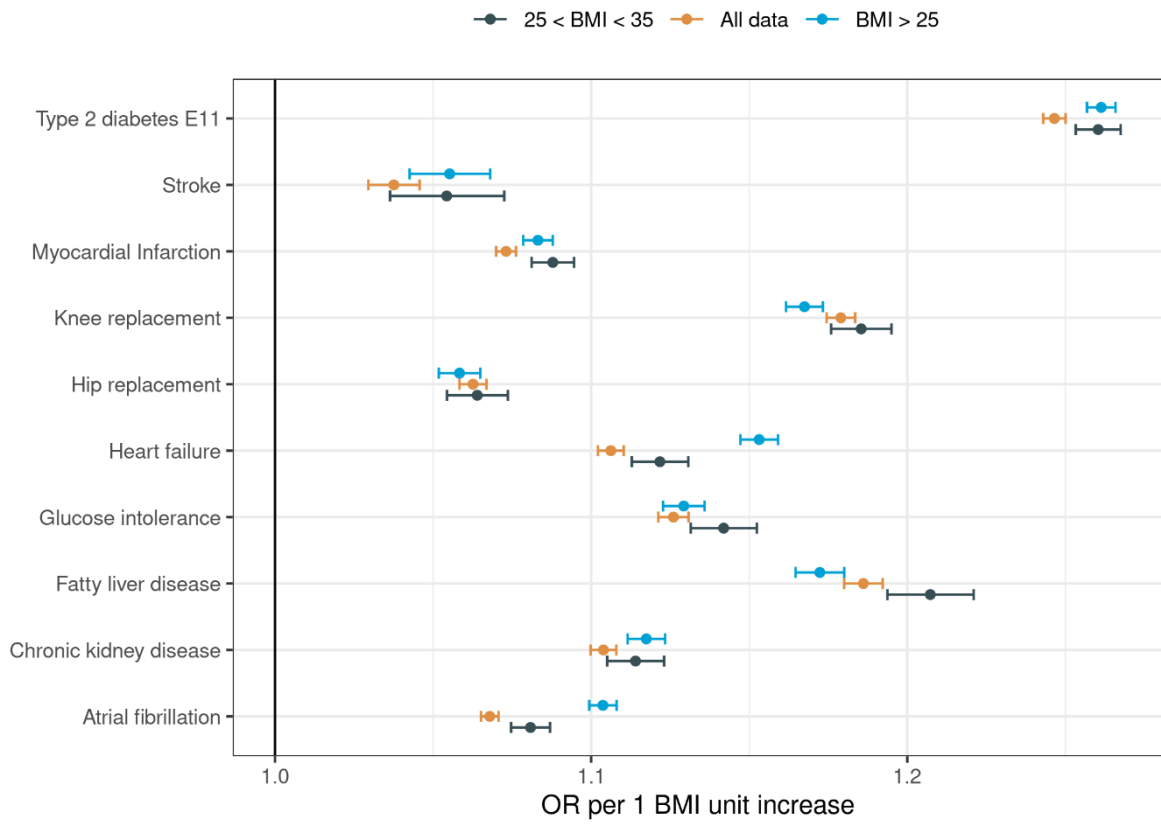

Supplementary Figure 23 Association of BMI Phenotype when restricting to specific BMI ranges in the UK Biobank data. The orange line corresponds to all data, whereas the blue one is excluding BMI below 25 and the black one is only individuals with BMI between 25 and 35. The error bars correspond to a 95% confidence interval for the parameter and the points represent ORs from logistic regression

### Score from Outliers, Associations in UKB with and w/o BMI itself Adjusted for sex, yob and 20 PCs

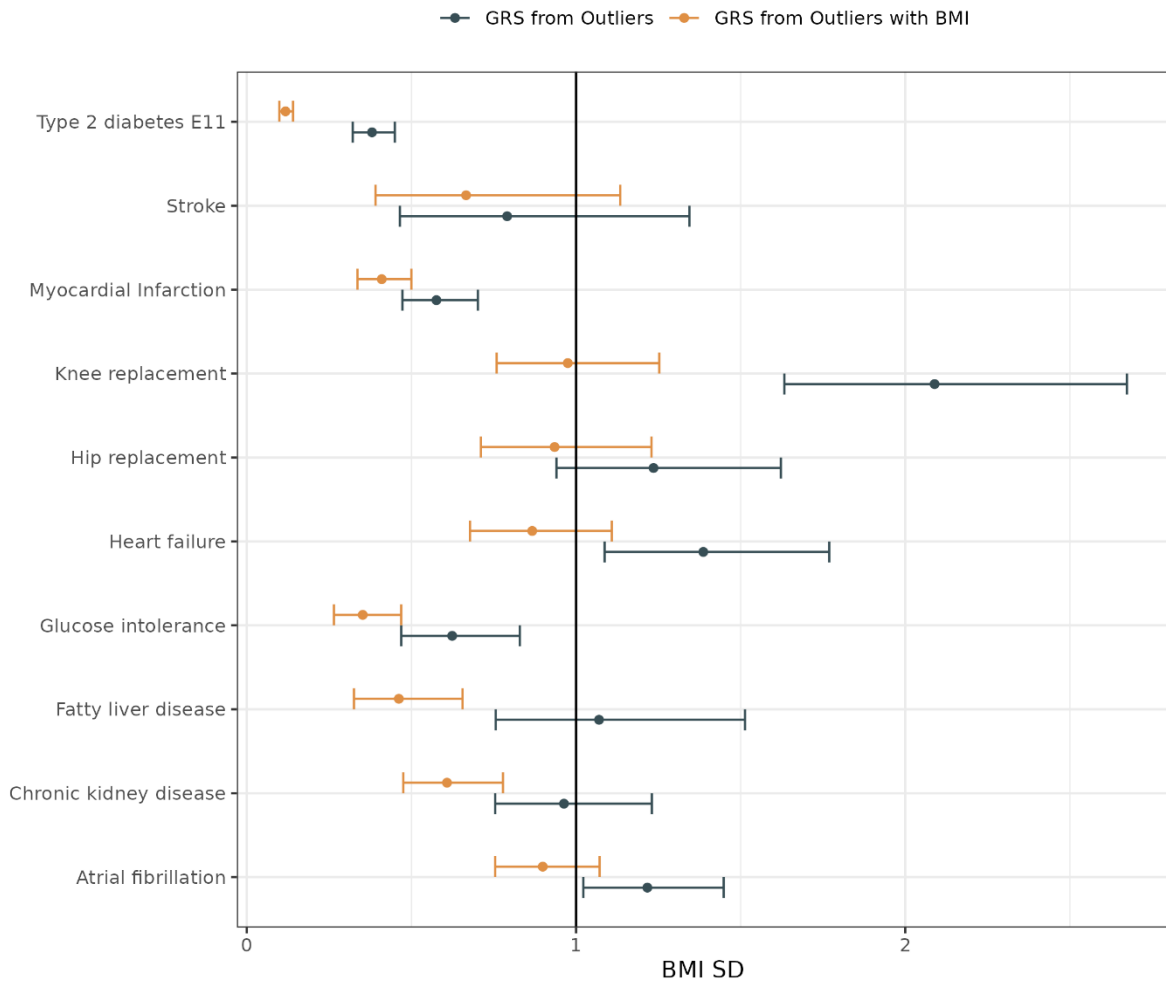

Supplementary Figure 24 Mediation analysis results for score created from outlier variants in UK data. The error bars correspond to a 95% confidence interval for the parameter and the points represent ORs from logistic regression

### BMI Distribution Icelandic data

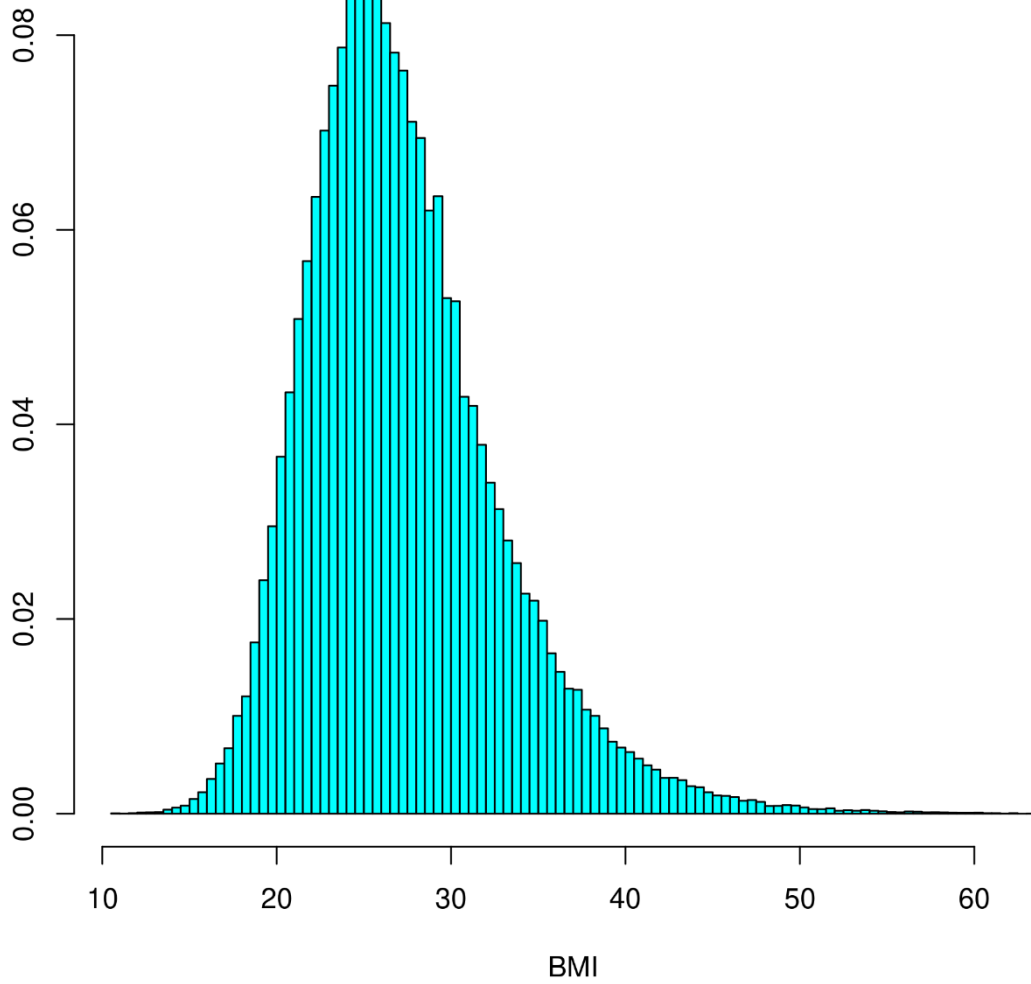

*Supplementary Figure 25 Distribution of raw BMI measurements in icelandic data. For individuals with multiple measurements, the value is averaged.*

### BMI Distribution UKBiobank data

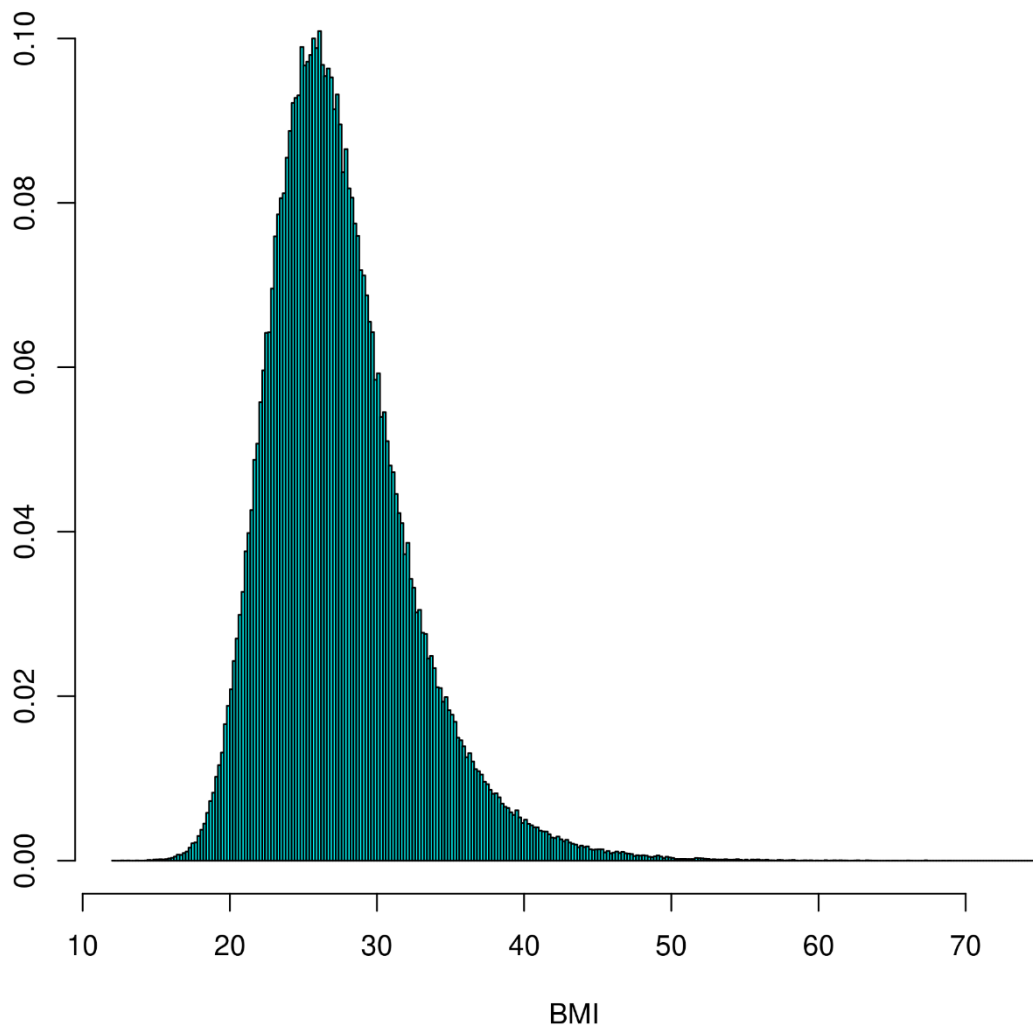

*Supplementary Figure 26 Distribution of BMI at first visit in the UK Biobank data.*

## Comparing centiles in BMI between Iceland and UKB

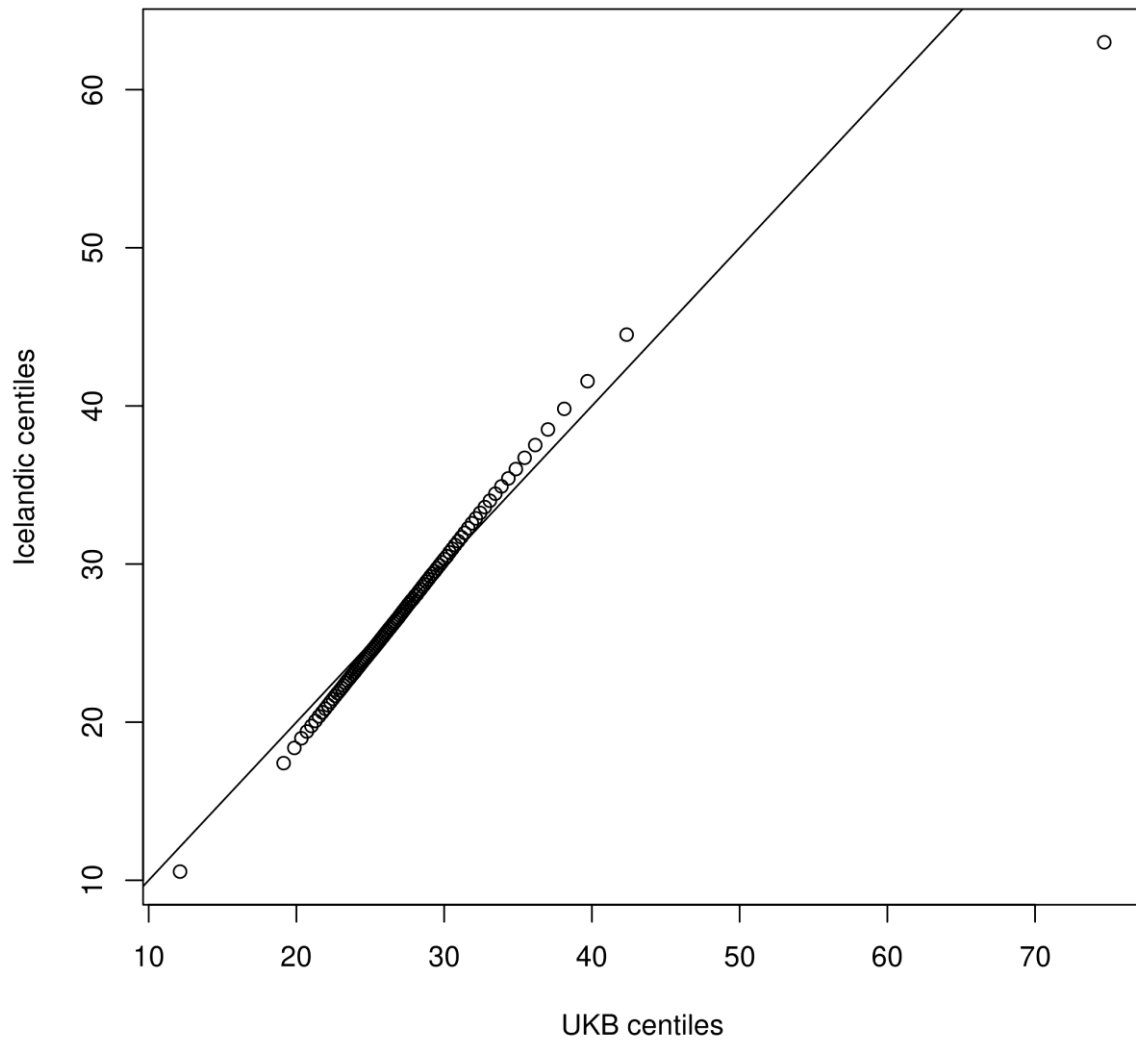

*Supplementary Figure 27 Comparing distribution of BMI in Iceland and UKBiobank. More spread is observed in the Icelandic data. The highest centile is much larger in the UKBiobank data.*

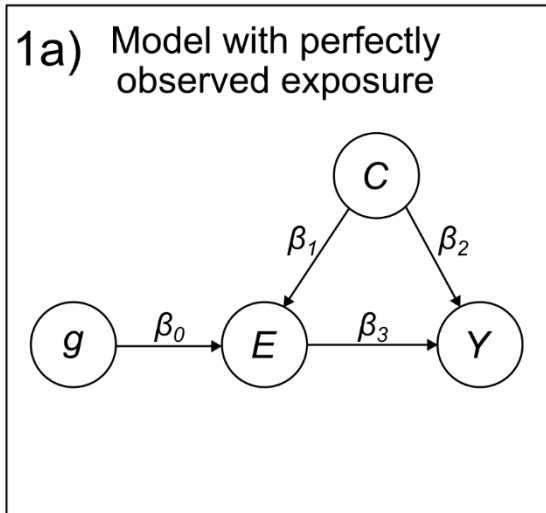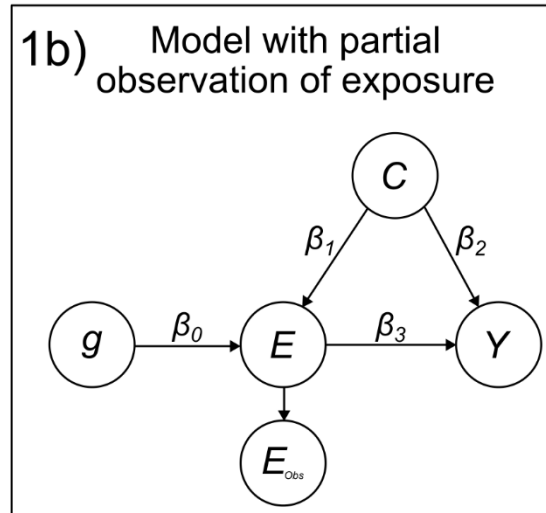

Supplementary Figure 28 On the left (panel 1a)) we have a model with perfect observation of the exposure, on the right (panel 1b)) we have a node depicting partial observation of the exposure.



### Overview of supplementary tables

|     |                                                                                           |
|-----|-------------------------------------------------------------------------------------------|
| S1  | Associations of BMI GRSs and PRSs with the BMI phenotype and raw BMI measurements         |
| S2  | Summary of BMI measurements                                                               |
| S3  | Main mediation results with the BMI-GRS score (outliers excluded)                         |
| S4  | Mediation results by sex in UK data with the BMI-GRS score (outliers excluded)            |
| S5  | Association of BMI-GRS with raw BMI by sex                                                |
| S6  | Mediation analysis with BMI-GRS-with-Outliers                                             |
| S7  | Mediation analysis with BMI-PRS                                                           |
| S8  | Proportion Mediated by Scores                                                             |
| S9  | Association of BMI phenotype with outcomes                                                |
| S10 | Association of BMI phenotype with outcomes stratified by BMI at first visit to UK Biobank |

### Associations of BMI-GRSs and PRSs with the BMI phenotype and raw BMI measurements

| score                     | Outcome       | N      | beta score | score SE | -log10 (p) | R2     |
|---------------------------|---------------|--------|------------|----------|------------|--------|
| UKB_PRS                   | BMI phenotype | 429700 | 0.298      | 0.0015   | 9059.9     | 0.0885 |
| UKB_GRS-with-Outliers     | BMI phenotype | 429700 | 0.243      | 0.0015   | 5855.5     | 0.0590 |
| UKB_GRS                   | BMI phenotype | 429700 | 0.235      | 0.0015   | 5455.8     | 0.0552 |
| Iceland_PRS               | BMI phenotype | 101304 | 0.319      | 0.0028   | 2815.6     | 0.1076 |
| Iceland_GRS-with-Outliers | BMI phenotype | 101304 | 0.222      | 0.0029   | 1303.6     | 0.0530 |
| Iceland_GRS               | BMI phenotype | 101304 | 0.213      | 0.0029   | 1201.2     | 0.0491 |
| UKB_PRS                   | BMI Raw       | 429628 | 1.393      | 0.0069   | 8802.7     | 0.0852 |
| UKB_GRS-with-Outliers     | BMI Raw       | 429628 | 1.136      | 0.0070   | 5675.8     | 0.0566 |
| UKB_GRS                   | BMI Raw       | 429628 | 1.099      | 0.0070   | 5282.3     | 0.0529 |
| Iceland_PRS               | BMI Raw       | 101304 | 1.825      | 0.0162   | 2761.4     | 0.1100 |
| Iceland_GRS-with-Outliers | BMI Raw       | 101304 | 1.270      | 0.0166   | 1274.1     | 0.0540 |
| Iceland_GRS               | BMI Raw       | 101304 | 1.216      | 0.0166   | 1171.0     | 0.0498 |

*Supplementary Table 1 All scores have been scaled to have variance 1. The BMI phenotype is described in the methods, essentially it is BMI corrected for standard covariates and inverse normal transformed. The raw BMI is the BMI at first visit in case of the UK Biobank data, for the Icelandic data, the raw BMI is the average of multiple measurements in case of many, the association is also adjusted for sex, job and principal components. The statistical test used is a two-sided t-test. P-values are not adjusted for multiple comparisons.*

### Summary of BMI measurements

| population | Mean BMI | SD BMI | BETA BMI phenotype regressed on raw BMI | BETA BMI inverse normal transformed regressed on raw BMI |
|------------|----------|--------|-----------------------------------------|----------------------------------------------------------|
| Iceland    | 27.26    | 5.57   | 5.15                                    | 5.43                                                     |
| UKBiobank  | 27.42    | 4.77   | 4.56                                    | 4.64                                                     |

*Supplementary Table 2 The raw BMI and BMI phenotypes are described in methods. The BMI inverse normal transformed is the raw bmi inverse normal transformed. Thus the values in the last two columns show the difference in effect when we adjust for covariates or not.*

### Main mediation results with BMI-GRS score

| Outcome                | N cases | N controls | population | Score OR<br>and 95% CI | -<br>log10(p) | Score adj bmi OR<br>and 95% CI | -log10(p adj) |
|------------------------|---------|------------|------------|------------------------|---------------|--------------------------------|---------------|
| Atrial fibrillation    | 11719   | 81147      | Iceland    | 1.068, (1.049, 1.086)  | 13.0          | 1.0264, (1.0084, 1.045)        | 2.418         |
| Chronic kidney disease | 2753    | 88587      | Iceland    | 1.089, (1.055, 1.125)  | 6.7           | 1.0519, (1.0178, 1.087)        | 2.584         |
| Fatty liver disease    | 587     | 93828      | Iceland    | 1.104, (1.033, 1.181)  | 2.4           | 0.9616, (0.8974, 1.030)        | 0.574         |
| Glucose intolerance    | 478     | 90862      | Iceland    | 1.174, (1.090, 1.265)  | 4.6           | 1.0736, (0.9947, 1.159)        | 1.167         |
| Heart failure          | 11210   | 80130      | Iceland    | 1.104, (1.084, 1.124)  | 24.9          | 1.0444, (1.0248, 1.064)        | 5.152         |
| Hip replacement        | 2817    | 42406      | Iceland    | 1.085, (1.050, 1.120)  | 6.1           | 1.0023, (0.9697, 1.036)        | 0.051         |
| Knee replacement       | 3603    | 42406      | Iceland    | 1.168, (1.135, 1.203)  | 25.0          | 1.0148, (0.9843, 1.046)        | 0.462         |
| Myocardial Infarction  | 10609   | 82576      | Iceland    | 1.060, (1.041, 1.079)  | 9.6           | 1.0272, (1.0084, 1.046)        | 2.364         |
| Stroke                 | 4615    | 88405      | Iceland    | 1.047, (1.020, 1.074)  | 3.3           | 1.0352, (1.0086, 1.062)        | 2.041         |
| Type 2 diabetes E11    | 11153   | 81662      | Iceland    | 1.227, (1.207, 1.248)  | 127.9         | 1.0537, (1.0352, 1.072)        | 8.159         |
| Atrial fibrillation    | 33733   | 395643     | UKBiobank  | 1.081, (1.070, 1.092)  | 47.3          | 1.0168, (1.0058, 1.028)        | 2.595         |
| Chronic kidney disease | 15888   | 413812     | UKBiobank  | 1.100, (1.084, 1.116)  | 36.2          | 1.0036, (0.9885, 1.019)        | 0.194         |
| Fatty liver disease    | 7552    | 421824     | UKBiobank  | 1.180, (1.156, 1.205)  | 54.2          | 0.9944, (0.9732, 1.016)        | 0.213         |
| Glucose intolerance    | 11382   | 417994     | UKBiobank  | 1.113, (1.094, 1.132)  | 34.0          | 0.9920, (0.9746, 1.010)        | 0.432         |
| Heart failure          | 16096   | 413172     | UKBiobank  | 1.165, (1.148, 1.182)  | 92.4          | 1.0637, (1.0477, 1.080)        | 14.884        |
| Hip replacement        | 12585   | 417115     | UKBiobank  | 1.087, (1.069, 1.104)  | 22.7          | 1.0283, (1.0112, 1.046)        | 2.951         |
| Knee replacement       | 15564   | 414028     | UKBiobank  | 1.176, (1.159, 1.194)  | 102.1         | 1.0106, (0.9951, 1.026)        | 0.740         |
| Myocardial Infarction  | 25221   | 404047     | UKBiobank  | 1.107, (1.094, 1.120)  | 62.9          | 1.0370, (1.0244, 1.050)        | 8.222         |
| Stroke                 | 3202    | 426066     | UKBiobank  | 1.037, (1.004, 1.070)  | 1.6           | 1.0017, (0.9694, 1.035)        | 0.037         |
| Type 2 diabetes E11    | 35663   | 393713     | UKBiobank  | 1.263, (1.250, 1.276)  | 447.4         | 1.0392, (1.0280, 1.050)        | 11.483        |

*Supplementary Table 3 Main mediation results for the BMI-GRS score with outliers excluded. We include grs score ORs and the grs score ORs adjusted for BMI. The odds ratios correspond to 1 unit increase in BMI. The statistical test used is a two-sided Wald test. P-values are not adjusted for multiple comparisons.*

### Mediation results stratified by sex in UK Biobank data with BMI-GRS score

| Outcome                | N cases | N controls | population        | Score OR and 95% CI    | -log10(p) | Score adj bmi OR and 95% CI | -log10(p adj) |
|------------------------|---------|------------|-------------------|------------------------|-----------|-----------------------------|---------------|
| Atrial fibrillation    | 12204   | 219633     | UKBiobank females | 1.077, (1.0602, 1.095) | 19.15     | 1.0176, (1.0009, 1.034)     | 1.418         |
| Chronic kidney disease | 8403    | 223612     | UKBiobank females | 1.083, (1.0630, 1.104) | 15.86     | 0.9910, (0.9718, 1.011)     | 0.433         |
| Fatty liver disease    | 3816    | 228021     | UKBiobank females | 1.195, (1.1629, 1.229) | 36.33     | 1.0048, (0.9765, 1.034)     | 0.129         |
| Glucose intolerance    | 5336    | 226501     | UKBiobank females | 1.115, (1.0889, 1.141) | 19.00     | 0.9958, (0.9720, 1.020)     | 0.133         |
| Heart failure          | 5616    | 226165     | UKBiobank females | 1.167, (1.1406, 1.194) | 38.78     | 1.0651, (1.0400, 1.091)     | 6.696         |
| Hip replacement        | 7478    | 224537     | UKBiobank females | 1.068, (1.0471, 1.090) | 10.00     | 1.0208, (1.0001, 1.042)     | 1.306         |
| Knee replacement       | 8449    | 223510     | UKBiobank females | 1.167, (1.1451, 1.189) | 56.88     | 0.9987, (0.9792, 1.019)     | 0.045         |
| Myocardial Infarction  | 7243    | 224538     | UKBiobank females | 1.080, (1.0585, 1.102) | 13.02     | 1.0130, (0.9920, 1.034)     | 0.645         |
| Stroke                 | 1225    | 230556     | UKBiobank females | 1.036, (0.9868, 1.087) | 0.81      | 0.9933, (0.9451, 1.044)     | 0.102         |
| Type 2 diabetes        | 13795   | 218042     | UKBiobank females | 1.264, (1.2457, 1.284) | 206.01    | 1.0379, (1.0214, 1.055)     | 5.287         |
| Atrial fibrillation    | 21520   | 175947     | UKBiobank males   | 1.086, (1.0705, 1.102) | 28.9      | 1.0168, (1.0018, 1.032)     | 1.56          |
| Chronic kidney disease | 7483    | 190130     | UKBiobank males   | 1.121, (1.0959, 1.148) | 21.7      | 1.0206, (0.9966, 1.045)     | 1.03          |
| Fatty liver disease    | 3734    | 193733     | UKBiobank males   | 1.165, (1.1282, 1.202) | 20.2      | 0.9837, (0.9516, 1.017)     | 0.48          |
| Glucose intolerance    | 6044    | 191423     | UKBiobank males   | 1.113, (1.0855, 1.142) | 16.1      | 0.9880, (0.9625, 1.014)     | 0.43          |
| Heart failure          | 10476   | 186939     | UKBiobank males   | 1.171, (1.1486, 1.195) | 55.2      | 1.0662, (1.0447, 1.088)     | 9.15          |
| Hip replacement        | 5107    | 192506     | UKBiobank males   | 1.116, (1.0858, 1.147) | 14.3      | 1.0402, (1.0111, 1.070)     | 2.19          |
| Knee replacement       | 7114    | 190447     | UKBiobank males   | 1.190, (1.1624, 1.219) | 46.8      | 1.0284, (1.0035, 1.054)     | 1.60          |
| Myocardial Infarction  | 17973   | 179442     | UKBiobank males   | 1.127, (1.1095, 1.144) | 51.8      | 1.0514, (1.0349, 1.068)     | 9.24          |
| Stroke                 | 1976    | 195439     | UKBiobank males   | 1.040, (0.9952, 1.086) | 1.1       | 1.0085, (0.9641, 1.055)     | 0.15          |
| Type 2 diabetes        | 21860   | 175607     | UKBiobank males   | 1.272, (1.2538, 1.290) | 244.4     | 1.0421, (1.0265, 1.058)     | 7.06          |

*Supplementary Table 4 Mediation results stratified by sex. We include grs score ORs and grs score ORs adjusted for BMI. The ORs correspond to 1 unit increase in BMI. The statistical test used is a two-sided Wald test. P-values are not adjusted for multiple comparisons.*

**Association of conservative BMI-GRS  
with raw BMI by sex**

| <b>SEX</b> | <b>BETA GRS REGRESSED ON RAW BMI</b> |
|------------|--------------------------------------|
| MALES      | 1.01                                 |
| FEMALES    | 1.17                                 |

*Supplementary Table 5 Association of BMI-GRS with raw BMI by sex. These scaling parameters are used for the sex specific analysis.*

### Mediation analysis with GRS-with-Outliers, conservative GRS and outliers

| Outcome                | N cases | N controls | population | Score OR and 95% CI   | -log10(p) | Score adj bmi OR and 95% CI | -log10(p adj) |
|------------------------|---------|------------|------------|-----------------------|-----------|-----------------------------|---------------|
| Atrial fibrillation    | 11719   | 81147      | Iceland    | 1.064, (1.047, 1.082) | 12.7      | 1.0227, (1.0054, 1.040)     | 2.011         |
| Chronic kidney disease | 2753    | 88587      | Iceland    | 1.076, (1.043, 1.110) | 5.4       | 1.0383, (1.0059, 1.072)     | 1.695         |
| Fatty liver disease    | 587     | 93828      | Iceland    | 1.090, (1.022, 1.162) | 2.0       | 0.9473, (0.8862, 1.013)     | 0.955         |
| Glucose intolerance    | 478     | 90862      | Iceland    | 1.169, (1.088, 1.255) | 4.7       | 1.0677, (0.9920, 1.149)     | 1.093         |
| Heart failure          | 11210   | 80130      | Iceland    | 1.100, (1.081, 1.120) | 25.2      | 1.0405, (1.0217, 1.060)     | 4.688         |
| Hip replacement        | 2817    | 42406      | Iceland    | 1.080, (1.047, 1.114) | 6.0       | 0.9975, (0.9662, 1.030)     | 0.057         |
| Knee replacement       | 3603    | 42406      | Iceland    | 1.173, (1.141, 1.206) | 28.3      | 1.0190, (0.9896, 1.049)     | 0.682         |
| Myocardial Infarction  | 10609   | 82576      | Iceland    | 1.047, (1.029, 1.065) | 6.7       | 1.0138, (0.9960, 1.032)     | 0.887         |
| Stroke                 | 4615    | 88405      | Iceland    | 1.038, (1.012, 1.063) | 2.5       | 1.0258, (1.0004, 1.052)     | 1.333         |
| Type 2 diabetes        | 11153   | 81662      | Iceland    | 1.197, (1.178, 1.216) | 107.4     | 1.0235, (1.0062, 1.041)     | 2.118         |
| Atrial fibrillation    | 33733   | 395643     | UKBiobank  | 1.078, (1.067, 1.089) | 47.1      | 1.0137, (1.0032, 1.0244)    | 1.969         |
| Chronic kidney disease | 15888   | 413812     | UKBiobank  | 1.091, (1.076, 1.107) | 32.7      | 0.9949, (0.9804, 1.0096)    | 0.306         |
| Fatty liver disease    | 7552    | 421824     | UKBiobank  | 1.166, (1.143, 1.190) | 50.4      | 0.9817, (0.9614, 1.0025)    | 1.075         |
| Glucose intolerance    | 11382   | 417994     | UKBiobank  | 1.096, (1.078, 1.114) | 26.7      | 0.9750, (0.9584, 0.9918)    | 2.434         |
| Heart failure          | 16096   | 413172     | UKBiobank  | 1.158, (1.141, 1.174) | 90.9      | 1.0564, (1.0410, 1.0720)    | 12.651        |
| Hip replacement        | 12585   | 417115     | UKBiobank  | 1.083, (1.067, 1.101) | 22.7      | 1.0251, (1.0085, 1.0419)    | 2.548         |
| Knee replacement       | 15564   | 414028     | UKBiobank  | 1.176, (1.159, 1.193) | 108.7     | 1.0094, (0.9944, 1.0246)    | 0.655         |
| Myocardial Infarction  | 25221   | 404047     | UKBiobank  | 1.089, (1.077, 1.102) | 47.4      | 1.0187, (1.0066, 1.0308)    | 2.646         |
| Stroke                 | 3202    | 426066     | UKBiobank  | 1.030, (0.999, 1.062) | 1.2       | 0.9947, (0.9636, 1.0267)    | 0.131         |
| Type 2 diabetes        | 35663   | 393713     | UKBiobank  | 1.221, (1.209, 1.233) | 352.5     | 0.9991, (0.9886, 1.0096)    | 0.066         |

*Supplementary Table 6 Mediation results for the independent marker GRS score which includes outliers. We include grs score ORs and the grs score ORs adjusted for BMI. The odds ratios correspond to 1 unit increase in BMI. The statistical test used is a two-sided Wald test. P-values are not adjusted for multiple comparisons.*

### Mediation analysis with PRS, liberal score

| Outcome                | N cases | N controls | population | Score OR<br>and 95% CI | -log10(p) | Score adj bmi OR<br>and 95% CI | -log10(p adj) |
|------------------------|---------|------------|------------|------------------------|-----------|--------------------------------|---------------|
| Atrial fibrillation    | 11585   | 79266      | Iceland    | 1.039, (1.0265, 1.051) | 9.73      | 1.0030, (0.9910, 1.015)        | 0.2034        |
| Chronic kidney disease | 2727    | 86656      | Iceland    | 1.057, (1.0345, 1.081) | 6.27      | 1.0265, (1.0036, 1.050)        | 1.6399        |
| Fatty liver disease    | 578     | 91857      | Iceland    | 1.078, (1.0308, 1.128) | 2.98      | 0.9556, (0.9113, 1.002)        | 1.2133        |
| Glucose intolerance    | 472     | 88911      | Iceland    | 1.117, (1.0630, 1.175) | 4.88      | 1.0350, (0.9823, 1.091)        | 0.7068        |
| Heart failure          | 11111   | 78272      | Iceland    | 1.072, (1.0588, 1.086) | 27.01     | 1.0226, (1.0094, 1.036)        | 3.1347        |
| Hip replacement        | 2783    | 41557      | Iceland    | 1.091, (1.0672, 1.115) | 14.30     | 1.0196, (0.9968, 1.043)        | 1.0331        |
| Knee replacement       | 2242    | 51028      | Iceland    | 1.158, (1.1305, 1.186) | 32.06     | 1.0458, (1.0197, 1.073)        | 3.2823        |
| Myocardial Infarction  | 10496   | 80669      | Iceland    | 1.035, (1.0226, 1.048) | 7.59      | 1.0076, (0.9950, 1.020)        | 0.6244        |
| Stroke                 | 4555    | 86446      | Iceland    | 1.011, (0.9934, 1.028) | 0.65      | 1.0001, (0.9824, 1.018)        | 0.0023        |
| Type 2 diabetes E11    | 10985   | 79815      | Iceland    | 1.157, (1.1437, 1.170) | 141.44    | 1.0099, (0.9977, 1.022)        | 0.9513        |
| Atrial fibrillation    | 33733   | 395643     | UKBiobank  | 1.085, (1.076, 1.094)  | 83.7      | 1.0198, (1.0110, 1.0287)       | 5.03          |
| Chronic kidney disease | 15888   | 413812     | UKBiobank  | 1.108, (1.095, 1.121)  | 66.7      | 1.0079, (0.9956, 1.0202)       | 0.68          |
| Fatty liver disease    | 7552    | 421824     | UKBiobank  | 1.163, (1.144, 1.182)  | 71.8      | 0.9721, (0.9553, 0.9892)       | 2.84          |
| Glucose intolerance    | 11382   | 417994     | UKBiobank  | 1.082, (1.067, 1.096)  | 29.6      | 0.9563, (0.9428, 0.9700)       | 9.11          |
| Heart failure          | 16096   | 413172     | UKBiobank  | 1.140, (1.126, 1.153)  | 108.3     | 1.0364, (1.0238, 1.0491)       | 8.04          |
| Hip replacement        | 12585   | 417115     | UKBiobank  | 1.076, (1.063, 1.090)  | 28.4      | 1.0163, (1.0026, 1.0301)       | 1.71          |
| Knee replacement       | 15564   | 414028     | UKBiobank  | 1.190, (1.176, 1.204)  | 186.7     | 1.0171, (1.0045, 1.0298)       | 2.12          |
| Myocardial Infarction  | 25221   | 404047     | UKBiobank  | 1.077, (1.067, 1.088)  | 54.3      | 1.0051, (0.9953, 1.0151)       | 0.51          |
| Stroke                 | 3202    | 426066     | UKBiobank  | 1.052, (1.025, 1.078)  | 4.1       | 1.0160, (0.9896, 1.0431)       | 0.62          |
| Type 2 diabetes E11    | 35663   | 393713     | UKBiobank  | 1.225, (1.215, 1.234)  | 538.9     | 0.9940, (0.9854, 1.0027)       | 0.75          |

*Supplementary Table 7 Mediation results for the 611K marker PRS score, the most liberal score of the ones we tried. We include grs score ORs and the grs score ORs adjusted for BMI. The odds ratios correspond to 1 unit increase in BMI. The statistical test used is a two-sided Wald test. P-values are not adjusted for multiple comparisons.*

### Proportion Mediation by Scores

| <b>Outcome</b>         | <b>population</b> | <b>GRS<br/>Conservative score<br/>proportion mediated</b> | <b>GRS-with-Outliers<br/>Conservative score + outliers<br/>proportion mediated</b> | <b>PRS<br/>Liberal score<br/>proportion mediated</b> |
|------------------------|-------------------|-----------------------------------------------------------|------------------------------------------------------------------------------------|------------------------------------------------------|
| Atrial fibrillation    | Iceland           | 0.72 (0.57, 0.96)                                         | 0.77 (0.61, 1.03)                                                                  | 1.02 (0.82, 1.33)                                    |
| Chronic kidney disease | Iceland           | 0.49 (0.33, 0.67)                                         | 0.57 (0.38, 0.79)                                                                  | 0.41 (0.31, 0.52)                                    |
| Fatty liver disease    | Iceland           | 1.40 (0.80, 5.69)                                         | 1.63 (0.89, 7.26)                                                                  | 1.13 (0.79, 1.91)                                    |
| Glucose intolerance    | Iceland           | 0.59 (0.37, 1.30)                                         | 0.62 (0.39, 1.37)                                                                  | 0.81 (0.51, 1.60)                                    |
| Heart failure          | Iceland           | 0.63 (0.54, 0.79)                                         | 0.66 (0.57, 0.82)                                                                  | 0.57 (0.51, 0.65)                                    |
| Hip replacement        | Iceland           | 1.03 (0.74, 1.63)                                         | 1.13 (0.79, 1.84)                                                                  | 1.00 (0.77, 1.32)                                    |
| Knee replacement       | Iceland           | 0.94 (0.81, 1.17)                                         | 0.93 (0.80, 1.14)                                                                  | 0.84 (0.76, 0.96)                                    |
| Myocardial Infarction  | Iceland           | 0.60 (0.46, 0.82)                                         | 0.76 (0.57, 1.13)                                                                  | 0.44 (0.37, 0.54)                                    |
| Stroke                 | Iceland           | 0.29 (0.17, 0.79)                                         | 0.34 (0.20, 1.18)                                                                  | 0.43 (0.25, 1.21)                                    |
| Type 2 diabetes E11    | Iceland           | 0.76 (0.70, 0.82)                                         | 0.87 (0.80, 0.95)                                                                  | 0.86 (0.80, 0.91)                                    |
| Atrial fibrillation    | UKBiobank         | 0.79 (0.70, 0.91)                                         | 0.82 ( 0.72, 0.94)                                                                 | 0.74 (0.67, 0.82)                                    |
| Chronic kidney disease | UKBiobank         | 0.96 (0.85, 1.15)                                         | 1.06 ( 0.92, 1.27)                                                                 | 0.92 (0.83, 1.05)                                    |
| Fatty liver disease    | UKBiobank         | 1.04 (0.92, 1.19)                                         | 1.13 ( 1.00, 1.30)                                                                 | 1.19 (1.06, 1.33)                                    |
| Glucose intolerance    | UKBiobank         | 1.08 (0.92, 1.28)                                         | 1.28 ( 1.07, 1.57)                                                                 | 1.48 (1.26, 1.78)                                    |
| Heart failure          | UKBiobank         | 0.61 (0.56, 0.68)                                         | 0.63 ( 0.58, 0.71)                                                                 | 0.71 (0.66, 0.79)                                    |
| Hip replacement        | UKBiobank         | 0.66 (0.55, 0.84)                                         | 0.69 ( 0.57, 0.87)                                                                 | 0.75 (0.63, 0.92)                                    |
| Knee replacement       | UKBiobank         | 0.94 (0.87, 1.03)                                         | 0.95 ( 0.87, 1.04)                                                                 | 0.90 (0.84, 0.96)                                    |
| Myocardial Infarction  | UKBiobank         | 0.65 (0.58, 0.74)                                         | 0.79 ( 0.70, 0.92)                                                                 | 0.88 (0.79, 1.00)                                    |
| Stroke                 | UKBiobank         | 0.96 (0.29, 4.95)                                         | 1.15 (-2.78, 11.73)                                                                | 0.79 (0.45, 1.95)                                    |
| Type 2 diabetes E11    | UKBiobank         | 0.85 (0.82, 0.89)                                         | 1.01 ( 0.96, 1.06)                                                                 | 1.02 (0.99, 1.07)                                    |

*Supplementary Table 8 Mediation results for all three scores, the proportion mediated by BMI measurements, proportion and 95% CIs.*

### Association of BMI phenotype with outcomes

| Outcome                | population | N cases | N controls | OR and 95% CI         | -log10(p) |
|------------------------|------------|---------|------------|-----------------------|-----------|
| Atrial fibrillation    | UKB        | 33733   | 395643     | 1.068, (1.065, 1.071) | 538.1     |
| Chronic kidney disease | UKB        | 15888   | 413812     | 1.104, (1.100, 1.108) | 600.6     |
| Fatty liver disease    | UKB        | 7552    | 421824     | 1.186, (1.180, 1.192) | 921.7     |
| Glucose intolerance    | UKB        | 11382   | 417994     | 1.126, (1.121, 1.131) | 655.7     |
| Heart failure          | UKB        | 16096   | 413172     | 1.106, (1.102, 1.110) | 631.3     |
| Hip replacement        | UKB        | 12585   | 417115     | 1.063, (1.058, 1.067) | 191.3     |
| Knee replacement       | UKB        | 15564   | 414028     | 1.179, (1.174, 1.184) | 1546.3    |
| Myocardial Infarction  | UKB        | 25221   | 404047     | 1.073, (1.070, 1.076) | 485.9     |
| Stroke                 | UKB        | 3202    | 426066     | 1.037, (1.029, 1.046) | 19.5      |
| Type 2 diabetes E11    | UKB        | 35663   | 393713     | 1.247, (1.243, 1.250) | 5034.2    |
| Atrial fibrillation    | Iceland    | 11719   | 81147      | 1.057, (1.051, 1.062) | 108.7     |
| Chronic kidney disease | Iceland    | 2753    | 88587      | 1.055, (1.045, 1.065) | 28.8      |
| Fatty liver disease    | Iceland    | 587     | 93828      | 1.147, (1.129, 1.166) | 61.6      |
| Glucose intolerance    | Iceland    | 478     | 90862      | 1.117, (1.096, 1.140) | 27.6      |
| Heart failure          | Iceland    | 11210   | 80130      | 1.086, (1.080, 1.091) | 198.2     |
| Hip replacement        | Iceland    | 2817    | 42406      | 1.110, (1.100, 1.120) | 115.2     |
| Knee replacement       | Iceland    | 3603    | 42406      | 1.201, (1.191, 1.211) | 392.5     |
| Myocardial Infarction  | Iceland    | 10609   | 82576      | 1.045, (1.040, 1.051) | 64.2      |
| Stroke                 | Iceland    | 4615    | 88405      | 1.018, (1.011, 1.025) | 5.9       |
| Type 2 diabetes E11    | Iceland    | 11153   | 81662      | 1.212, (1.206, 1.217) | 1301.2    |

*Supplementary Table 9 Associations of BMI phenotype with outcomes in Icelandic and UK data. The statistical test used is a two-sided Wald test. P-values are not adjusted for multiple comparisons.*



**Association of BMI phenotype with outcomes stratified by BMI at first visit to UK Biobank**

| <b>Outcome</b>         | <b>Strata</b> | <b>OR</b> | <b>LOWER 95% CI</b> | <b>UPPER 95% CI</b> |
|------------------------|---------------|-----------|---------------------|---------------------|
| Atrial fibrillation    | All data      | 1.068     | 1.071               | 1.065               |
| Chronic kidney disease | All data      | 1.104     | 1.108               | 1.100               |
| Fatty liver disease    | All data      | 1.186     | 1.192               | 1.180               |
| Glucose intolerance    | All data      | 1.126     | 1.131               | 1.121               |
| Heart failure          | All data      | 1.106     | 1.110               | 1.102               |
| Hip replacement        | All data      | 1.063     | 1.067               | 1.058               |
| Knee replacement       | All data      | 1.179     | 1.184               | 1.174               |
| Myocardial Infarction  | All data      | 1.073     | 1.076               | 1.070               |
| Stroke                 | All data      | 1.038     | 1.046               | 1.030               |
| Type 2 diabetes E11    | All data      | 1.247     | 1.250               | 1.243               |
| Atrial fibrillation    | BMI > 25      | 1.104     | 1.108               | 1.099               |
| Chronic kidney disease | BMI > 25      | 1.117     | 1.123               | 1.112               |
| Fatty liver disease    | BMI > 25      | 1.172     | 1.180               | 1.165               |
| Glucose intolerance    | BMI > 25      | 1.129     | 1.136               | 1.123               |
| Heart failure          | BMI > 25      | 1.153     | 1.159               | 1.147               |
| Hip replacement        | BMI > 25      | 1.058     | 1.065               | 1.052               |
| Knee replacement       | BMI > 25      | 1.167     | 1.173               | 1.162               |
| Myocardial Infarction  | BMI > 25      | 1.083     | 1.088               | 1.078               |
| Stroke                 | BMI > 25      | 1.055     | 1.068               | 1.043               |
| Type 2 diabetes E11    | BMI > 25      | 1.261     | 1.266               | 1.257               |
| Atrial fibrillation    | 25 < BMI < 35 | 1.081     | 1.087               | 1.075               |
| Chronic kidney disease | 25 < BMI < 35 | 1.114     | 1.123               | 1.105               |
| Fatty liver disease    | 25 < BMI < 35 | 1.207     | 1.221               | 1.194               |
| Glucose intolerance    | 25 < BMI < 35 | 1.142     | 1.152               | 1.132               |
| Heart failure          | 25 < BMI < 35 | 1.122     | 1.131               | 1.113               |
| Hip replacement        | 25 < BMI < 35 | 1.064     | 1.074               | 1.054               |
| Knee replacement       | 25 < BMI < 35 | 1.185     | 1.195               | 1.176               |
| Myocardial Infarction  | 25 < BMI < 35 | 1.088     | 1.095               | 1.081               |
| Stroke                 | 25 < BMI < 35 | 1.054     | 1.073               | 1.036               |
| Type 2 diabetes E11    | 25 < BMI < 35 | 1.260     | 1.268               | 1.253               |

*Supplementary Table 10 BMI phenotype associations in UK data, stratified by BMI at first visit*

## Supplementary References

1. Thorolfsson, R.B. *et al.* Coding variants in RPL3L and MYZAP increase risk of atrial fibrillation. *Communications biology* **1**, 68 (2018).
2. Sveinbjornsson, G. *et al.* Multiomics study of nonalcoholic fatty liver disease. *Nature Genetics*, 1-12 (2022).
3. Styrkarsdottir, U. *et al.* The CRTAC1 Protein in Plasma Is Associated With Osteoarthritis and Predicts Progression to Joint Replacement: A Large-Scale Proteomics Scan in Iceland. *Arthritis & Rheumatology* **73**, 2025-2034 (2021).
4. Helgadóttir, A. *et al.* Cholesterol not particle concentration mediates the atherogenic risk conferred by apolipoprotein B particles: a Mendelian randomization analysis. *European Journal of Preventive Cardiology* **29**, 2374-2385 (2022).
5. Malik, R. *et al.* Multiancestry genome-wide association study of 520,000 subjects identifies 32 loci associated with stroke and stroke subtypes. *Nature genetics* **50**, 524-537 (2018).
6. Jonsdóttir, G.A. *et al.* Genetic propensities for verbal and spatial ability have opposite effects on body mass index and risk of schizophrenia. *Intelligence* **88**, 101565 (2021).
7. Yengo, L. *et al.* Meta-analysis of genome-wide association studies for height and body mass index in ~ 700,000 individuals of European ancestry. *Human molecular genetics* **27**, 3641-3649 (2018).
8. Verbanck, M., Chen, C.-Y., Neale, B. & Do, R. Detection of widespread horizontal pleiotropy in causal relationships inferred from Mendelian randomization between complex traits and diseases. *Nature genetics* **50**, 693-698 (2018).
